# Supplementary material for: Reconstructing East Antarctic Temperature and Snowfall Variability from δ15N of N2
Source: Research Square preprint supplement (doi:10.21203/rs.3.rs-8345157/v1), 2026-01-13
Supplement: Supplementary file 1 [file f70fc6f04de630f6e45c256d.xlsx]

## Sheet: Compilation
depth [m]	gas age AICC2023 [ka BP]	gas age uncertainty AICC2023 [kyr]	δ15N [‰]
1086.55	70.4377	1.217	0.4
1089.85	70.8087	1.05673	0.412		Grisart
1092.05	71.0752	0.956364	0.414		Prié and Landais
1095.35	71.3949	0.946636	0.407		Bouchet
1097.55	71.5522	0.939455	0.406		Klüssendorf
1100.3	71.7133	0.941	0.441		Brückner
1100.85	71.7484	0.942091	0.437		Dreyfus et al. (2010); Landais et al. (2013); Bréant et al. (2017, 2019); Legrain et al. (submitted)
1103.05	71.9197	0.964455	0.436
1106.35	72.2573	0.956909	0.404
1106.35	72.2573	0.956909	0.412
1108.55	72.5448	0.970091	0.395
1111.85	72.9883	1.01	0.4
1114.05	73.2905	1.04118	0.389
1117.35	73.6801	1.03291	0.383
1119.55	73.8857	1.02954	0.39
1122.85	74.1816	1.02491	0.414
1125.05	74.4003	1.02364	0.386
1127.8	74.6509	1.02218	0.399
1128.35	74.6981	1.02291	0.412
1130.55	74.8678	1.00327	0.408
1133.85	75.087	1.00173	0.42
1136.05	75.2358	1.00227	0.402
1139.35	75.4829	0.987909	0.441
1141.55	75.6847	1.00164	0.422
1144.85	76.0142	1.02609	0.402
1147.05	76.2222	1.04291	0.454
1150.35	76.6332	1.08673	0.43
1152.55	76.9689	1.07655	0.379
1155.3	77.3241	1.089	0.399
1158.05	77.5696	1.09618	0.392
1161.35	77.7813	1.10045	0.404
1163.55	77.9206	1.09918	0.415
1166.85	78.2436	1.10455	0.408
1169.05	78.5011	1.19427	0.427
1489.95	110.49	0.833	0.396626
1490.52	110.561	0.817927	0.422995
1492.7	110.831	0.828	0.430092
1493.27	110.909	0.827564	0.423994
1494.9	111.108	0.814	0.424696
1496.02	111.247	0.807691	0.423807
1497.1	111.388	0.822	0.411233
1498.77	111.589	0.828782	0.433212
1499.85	111.728	0.817	0.431556
1501.52	111.928	0.810145	0.413345
1502.05	111.991	0.814	0.442967
1504.27	112.267	0.807745	0.431881
1504.8	112.336	0.801	0.438859
1507.02	112.634	0.793145	0.439558
1507.55	112.699	0.797	0.442482
1509.77	112.975	0.788891	0.433404
1510.3	113.036	0.786	0.439683
1515.27	113.532	0.799673	0.435161
1515.8	113.587	0.791	0.445762
1518.02	113.833	0.815455	0.448066
1519.1	113.954	0.803	0.433331
1520.77	114.136	0.799291	0.449483
1521.85	114.26	0.819	0.444744
1523.52	114.474	0.811218	0.448475
1524.6	114.615	0.821	0.467381
1526.27	114.819	0.809036	0.437658
1527.9	115.018	0.815	0.452098
1529.02	115.148	0.810964	0.449895
1531.2	115.382	0.79	0.456866
1531.77	115.439	0.794855	0.456934
1534.5	115.681	0.787	0.466682
1537.27	115.931	0.7784	0.46505
1537.8	115.98	0.789	0.479784
1542.77	116.489	0.770745	0.469144
1544.95	116.694	0.768	0.44385
1545.52	116.745	0.764818	0.463546
1548.25	116.983	0.775	0.469296
1548.27	116.985	0.774855	0.475155
1551.02	117.221	0.7816	0.464997
1552.1	117.314	0.772	0.481133
1553.77	117.47	0.775218	0.472295
1556.52	117.745	0.770564	0.48085
1559.25	118.012	0.761	0.494298
1559.27	118.014	0.761036	0.459742
1562.02	118.283	0.754745	0.447057
1564.77	118.484	0.749964	0.483268
1566.4	118.593	0.741	0.487097
1570.25	118.863	0.742	0.515212
1573.02	119.117	0.734927	0.475806
1573.55	119.17	0.733	0.491448
1578.52	119.667	0.721927	0.489051
1581.25	119.922	0.711	0.425691
1581.27	119.924	0.711073	0.480803
1584.02	120.134	0.706891	0.471543
1585.65	120.246	0.7	0.510189
1586.77	120.318	0.700073	0.462539
1587.85	120.386	0.704	0.49036
1588.95	120.458	0.712	0.49154
1589.52	120.495	0.711964	0.472298
1592.27	120.674	0.721145	0.48032
1595.18	120.864	0.719636	0.481
1596.65	120.967	0.721	0.502308
1597.77	121.05	0.725182	0.475122
1600.5	121.286	0.732	0.47138
1600.52	121.288	0.731891	0.47611
1603.27	121.52	0.727073	0.462412
1604.35	121.606	0.732	0.467435
1606.02	121.728	0.735109	0.47409
1608.2	121.869	0.737	0.473134
1608.77	121.903	0.736927	0.474279
1611.52	122.061	0.735036	0.482584
1614.27	122.233	0.740891	0.480731
1617.02	122.43	0.742036	0.473689
1619.75	122.618	0.735	0.459505
1619.77	122.62	0.735	0.484416
1622.68	122.8	0.739618	0.479667
1623.6	122.858	0.746	0.465786
1625.27	122.962	0.748364	0.477559
1628	123.149	0.754	0.491435
1628.02	123.15	0.754073	0.481552
1630.77	123.339	0.748927	0.482991
1633.52	123.55	0.753036	0.482261
1636.27	123.787	0.748855	0.475663
1639.02	124.022	0.749073	0.474469
1639.55	124.066	0.751	0.409037
1641.77	124.226	0.750073	0.471436
1644.52	124.395	0.750036	0.471987
1647.25	124.563	0.75	0.488761
1647.27	124.565	0.749855	0.470583
1650.21	124.757	0.743618	0.469
1651.1	124.813	0.745	0.503708
1652.77	124.928	0.754745	0.468691
1654.95	125.066	0.736	0.480982
1655.52	125.098	0.738036	0.491298
1658.25	125.266	0.742	0.456878
1658.27	125.267	0.742	0.484951
1661.02	125.458	0.750891	0.47515
1663.77	125.658	0.743964	0.495225
1667.05	125.877	0.748	0.468584
1669.27	126.023	0.747036	0.490808
1669.48	126.037	0.747418	0.486
1670.9	126.14	0.749	0.489577
1672.02	126.225	0.744964	0.481
1674.77	126.464	0.748109	0.494956
1675.3	126.512	0.751	0.426702
1677.52	126.699	0.748927	0.485119
1679.7	126.856	0.742	0.462668
1683.02	127.091	0.753182	0.48613
1684.1	127.184	0.758	0.497449
1685.77	127.331	0.741964	0.476769
1691.28	127.751	0.726164	0.476
1694.02	127.93	0.726073	0.505833
1696.77	128.123	0.721964	0.496465
1699.52	128.315	0.721036	0.490328
1702.27	128.486	0.711036	0.492001
1705.53	128.657	0.709036	0.507667
1706.65	128.716	0.71	0.528787
1707.77	128.782	0.712	0.503608
1710.5	128.943	0.71	0.509523
1710.52	128.945	0.709964	0.499427
1713.27	129.1	0.711	0.517154
1714.9	129.191	0.712	0.501468
1716.02	129.254	0.714	0.521981
1718.77	129.411	0.717182	0.506337
1721.52	129.572	0.732927	0.51051
1722.6	129.635	0.731	0.51793
1724.27	129.732	0.736	0.512084
1726.45	129.86	0.734	0.519916
1727.02	129.894	0.744182	0.49934
1729.77	130.067	0.747964	0.509672
1730.3	130.1	0.747	0.50256
1732.7	130.25	0.754818	0.4975
1733.6	130.309	0.767	0.5113
1735.27	130.416	0.759109	0.491
1738.02	130.58	0.77	0.495944
1740.77	130.73	0.778891	0.489534
1742.4	130.818	0.782	0.518601
1743.52	130.887	0.780964	0.50012
1745.15	130.998	0.786	0.527389
1746.27	131.087	0.797927	0.495286
1747.9	131.225	0.8	0.503157
1749.02	131.323	0.806036	0.492591
1750.65	131.462	0.816	0.430976
1751.77	131.55	0.817	0.488652
1753.95	131.706	0.819	0.493729
1754.52	131.747	0.824145	0.485907
1755.6	131.83	0.828	0.488325
1758.35	132.064	0.842	0.472579
1760.18	132.258	0.849327	0.464
1761.1	132.355	0.858	0.46838
1762.77	132.531	0.8624	0.459674
1764.95	132.745	0.865	0.462776
1765.52	132.798	0.862291	0.453897
1766.6	132.901	0.878	0.441364
1768.27	133.071	0.883473	0.457299
1768.8	133.13	0.896	0.510724
1770.45	133.342	0.905	0.44379
1772.1	133.571	0.922	0.430461
1773.75	133.79	0.929	0.415977
1773.83	133.801	0.928564	0.44
1775.4	134.006	0.915	0.417132
1776.52	134.155	0.939036	0.433274
1777.05	134.229	0.94	0.427759
1779.37	134.559	0.954818	0.434
1782	134.971	0.965	0.40462
1782.02	134.974	0.965218	0.407326
1783.65	135.256	0.979	0.369314
1784.75	135.451	0.995	0.382372
1784.77	135.455	0.995509	0.409928
1784.84	135.468	0.997291	0.416333
1786.4	135.767	1.018	0.412387
1787.52	135.995	1.00365	0.408136
1787.58	136.007	1.00562	0.3955
1788.6	136.213	1.007	0.385564
1789.15	136.318	1.008	0.368034
1790.42	136.583	1.03433	0.405
1793.02	137.106	1.03929	0.379648
1795.83	137.582	1.04571	0.3815
1801.33	138.537	1.06244	0.3805
1804.57	139.204	1.09211	0.381
1806.83	139.665	1.0906	0.387
1806.83	139.665	1.0906	0.387
1809.52	140.223	1.10255	0.373016
1812.41	140.799	1.11371	0.385
1815.08	141.332	1.10713	0.3855
1817.77	141.876	1.09569	0.387841
1817.83	141.888	1.09776	0.386
1823.33	143.048	1.14705	0.3845
1828.83	144.172	1.22698	0.3845
1834.38	145.18	1.26126	0.3995
1839.77	146.215	1.33158	0.412191
1845.33	147.316	1.34102	0.408
1867.27	151.636	1.40411	0.39677
1869.58	152.102	1.40353	0.435254
1870.02	152.194	1.40204	0.39737
1873.93	152.986	1.38213	0.426078
1874.98	153.175	1.38394	0.38
1876.63	153.457	1.37594	0.381
1877.73	153.646	1.37695	0.403
1879.93	154.037	1.35878	0.403
1880.48	154.134	1.355	0.417
1882.13	154.452	1.35689	0.39
1884.88	155.051	1.32816	0.417
1886.03	155.341	1.32127	0.387
1887.63	155.748	1.30156	0.393
1888.73	156.025	1.29029	0.404
1889.83	156.299	1.27084	0.406
1891.04	156.617	1.26998	0.362
1891.48	156.74	1.2664	0.352
1893.13	157.151	1.23767	0.375
1894.28	157.418	1.22184	0.377
1895.33	157.65	1.20684	0.378
1901.49	158.994	1.10671	0.367
1902.48	159.204	1.08662	0.362
1904.13	159.505	1.07284	0.371
1909.63	160.395	1.04373	0.369
1910.18	160.49	1.03895	0.387
1912.38	160.903	1.02562	0.381
1913.48	161.124	1.01494	0.376
1915.13	161.503	1.01262	0.371
1916.28	161.788	1.00369	0.358
1917.33	162.047	0.979455	0.379
1918.98	162.434	0.955782	0.356
1921.78	163.036	0.929145	0.336
1923.93	163.459	0.929945	0.336
1926.18	163.871	0.944164	0.353
1927.28	164.085	0.938545	0.346
1928.33	164.278	0.941491	0.344
1929.98	164.625	0.958945	0.361
1931.63	165.003	0.947436	0.345
1933.83	165.522	0.983727	0.358
1937.13	166.35	0.988709	0.336
1937.68	166.488	1.00138	0.351
1939.88	167.041	1.026	0.315
1940.98	167.305	1.02173	0.33
1942.74	167.678	1.02273	0.323
1944.83	168.073	1.04467	0.348
1946.48	168.356	1.03122	0.33
1948.13	168.602	1.03144	0.331
1949.23	168.76	1.05306	0.35
1950.33	168.927	1.05422	0.369
1950.88	169.013	1.05871	0.367
1952.03	169.216	1.08269	0.38
1954.18	169.625	1.07382	0.39
1956.38	170.129	1.09184	0.36
1959.13	170.783	1.12556	0.367
1967.38	172.61	1.09522	0.379
1968.48	172.845	1.10011	0.37
1970.13	173.216	1.10944	0.366
1971.23	173.483	1.11211	0.382
1973.98	174.159	1.11133	0.357
1975.63	174.567	1.12146	0.381
1976.78	174.853	1.10027	0.36
1977.83	175.104	1.09462	0.376
1980.03	175.614	1.07351	0.381
1982.28	176.121	1.07529	0.381
1983.33	176.359	1.08749	0.38
1984.98	176.777	1.11555	0.395
1986.63	177.229	1.11611	0.375
1989.38	177.93	1.09918	0.376
1990.48	178.165	1.07651	0.367
1995.95	179.174	1.042	0.406644
1995.98	179.179	1.04216	0.387
1997.63	179.487	1.04449	0.387
1998.73	179.714	1.054	0.401
2001.04	180.214	1.07729	0.389
2001.48	180.314	1.08471	0.401
2003.13	180.718	1.12238	0.414
2004.28	181.019	1.13913	0.399
2005.33	181.296	1.11915	0.381
2006.98	181.741	1.12893	0.404
2009.18	182.387	1.15505	0.382
2011.38	183.009	1.16831	0.366
2012.53	183.294	1.15849	0.386
2014.13	183.701	1.16566	0.364
2019.74	185.102	1.21925	0.4
2022.38	185.768	1.23516	0.348
2023.48	186.02	1.24204	0.368
2025.24	186.412	1.25655	0.398
2026.75	186.738	1.267	0.436955
2027.33	186.861	1.25856	0.430659
2028.98	187.207	1.26255	0.425692
2030.05	187.446	1.275	0.360255
2030.63	187.573	1.279	0.435444
2031.15	187.689	1.279	0.426422
2031.18	187.696	1.27856	0.445186
2032.8	188.059	1.275	0.388329
2033.38	188.187	1.27075	0.426988
2034.45	188.409	1.261	0.455405
2034.48	188.415	1.26062	0.448591
2036.1	188.749	1.255	0.409269
2037.23	188.968	1.25051	0.456103
2038.33	189.157	1.23489	0.461621
2038.85	189.239	1.233	0.36939
2039.95	189.406	1.226	0.460878
2039.98	189.41	1.22589	0.474964
2041.6	189.648	1.211	0.431596
2041.63	189.652	1.21062	0.47127
2042.7	189.798	1.207	0.458816
2042.73	189.802	1.20684	0.452646
2042.78	189.809	1.20656	0.479032
2043.83	189.961	1.21522	0.474277
2044.35	190.049	1.219	0.443524
2045.48	190.252	1.218	0.467893
2046	190.35	1.218	0.444212
2047.13	190.585	1.21678	0.45857
2047.65	190.701	1.213	0.437416
2050.98	191.479	1.18933	0.434394
2052.05	191.753	1.21	0.450208
2052.6	191.901	1.198	0.406004
2053.15	192.046	1.209	0.446259
2054.8	192.525	1.221	0.370001
2054.83	192.534	1.22144	0.452432
2055.9	192.818	1.216	0.416219
2057.55	193.205	1.207	0.417849
2058.65	193.425	1.201	0.37885
2060.27	193.692	1.18116	0.430694
2060.3	193.696	1.181	0.421055
2061.95	193.93	1.169	0.423422
2061.98	193.934	1.169	0.468881
2063.02	194.085	1.169	0.456622
2063.6	194.181	1.191	0.468617
2066.35	194.752	1.184	0.430971
2066.38	194.758	1.18525	0.477611
2067.53	195.037	1.21925	0.457096
2068	195.156	1.209	0.433515
2068.52	195.288	1.209	0.465637
2069.65	195.576	1.202	0.417566
2071.3	195.975	1.201	0.423501
2072.4	196.215	1.193	0.47921
2072.95	196.331	1.19	0.423333
2074.72	196.674	1.18678	0.430258
2075.7	196.84	1.19	0.42054
2076.83	197.026	1.19367	0.467381
2080.65	197.652	1.184	0.483516
2081.23	197.757	1.19373	0.46327
2082.3	197.962	1.192	0.440954
2082.33	197.968	1.19129	0.433766
2083.95	198.288	1.192	0.451005
2086.73	198.862	1.17105	0.498868
2087.8	199.082	1.166	0.450728
2087.8	199.082	1.166	0.465628
2089.04	199.315	1.16324	0.408
2091.65	199.749	1.154	0.399828
2091.79	199.77	1.15502	0.409
2093.3	199.979	1.149	0.468121
2097.78	200.448	1.14642	0.485861
2098.83	200.59	1.14505	0.481879
2101	200.945	1.147	0.514728
2102.1	201.147	1.152	0.50022
2102.13	201.152	1.15162	0.479828
2102.79	201.273	1.14373	0.423
2103.75	201.433	1.141	0.451231
2105.95	201.788	1.144	0.453584
2105.98	201.793	1.14389	0.438862
2107.05	201.959	1.141	0.48069
2108.15	202.13	1.133	0.48964
2108.73	202.222	1.132	0.463873
2109.8	202.409	1.13	0.52566
2109.83	202.415	1.12994	0.447954
2111.45	202.74	1.13	0.466047
2111.53	202.757	1.12869	0.434871
2113.28	203.121	1.11864	0.399
2114.23	203.325	1.11989	0.44736
2115.33	203.554	1.122	0.46981
2115.85	203.665	1.122	0.451338
2117.03	203.9	1.11515	0.461725
2117.5	203.989	1.116	0.434149
2118.74	204.23	1.11796	0.411
2119.15	204.306	1.112	0.428981
2120.8	204.637	1.12	0.448699
2120.83	204.644	1.11973	0.453038
2122.45	204.996	1.109	0.427823
2122.53	205.015	1.10973	0.439608
2124.1	205.379	1.108	0.430081
2124.24	205.411	1.11004	0.396
2125.75	205.754	1.111	0.406655
2127.4	206.088	1.102	0.415119
2129.05	206.405	1.11	0.413644
2129.72	206.526	1.10287	0.415554
2132.35	206.973	1.1	0.414413
2134.55	207.334	1.103	0.437766
2136.2	207.614	1.107	0.411367
2137.85	207.886	1.095	0.437071
2139.56	208.163	1.10467	0.430701
2140.05	208.246	1.102	0.427127
2142.28	208.63	1.11822	0.436328
2143.35	208.817	1.13	0.449332
2145.52	209.185	1.12773	0.431637
2146.1	209.279	1.134	0.413153
2147.75	209.547	1.142	0.452386
2148.27	209.631	1.14295	0.448084
2149.95	209.913	1.157	0.434326
2150.47	210.001	1.15038	0.452907
2151.18	210.117	1.15036	0.451763
2151.6	210.186	1.158	0.443373
2153.77	210.538	1.16562	0.47157
2155.45	210.797	1.17	0.429061
2156.06	210.884	1.16631	0.443497
2157.1	211.031	1.169	0.439196
2158.75	211.248	1.173	0.428644
2159.27	211.314	1.17773	0.4542
2160.95	211.529	1.169	0.485619
2161.56	211.612	1.18209	0.464085
2164.77	212.141	1.22145	0.472055
2166.45	212.438	1.221	0.444463
2167.52	212.628	1.22249	0.459959
2168.1	212.725	1.225	0.458895
2170.3	213.088	1.238	0.453971
2170.97	213.196	1.24956	0.445496
2171.95	213.347	1.248	0.453828
2173.6	213.595	1.264	0.463889
2175.77	213.943	1.26638	0.442669
2178	214.292	1.27	0.480166
2178.52	214.379	1.27094	0.463045
2179.65	214.567	1.27	0.476048
2181.85	214.984	1.282	0.465242
2182.4	215.101	1.28	0.458001
2183.5	215.319	1.266	0.475047
2185.7	215.759	1.268	0.464394
2188.45	216.244	1.251	0.403236
2188.48	216.248	1.25089	0.465915
2189.59	216.412	1.24671	0.427927
2192.27	216.771	1.236	0.449426
2192.85	216.857	1.233	0.506731
2192.89	216.863	1.23271	0.504949
2194.5	217.125	1.225	0.471374
2197.25	217.65	1.213	0.41263
2198.9	217.988	1.2	0.480408
2199.42	218.092	1.19716	0.471025
2200	218.211	1.193	0.486198
2201.65	218.565	1.179	0.415228
2203.77	218.997	1.15873	0.442389
2203.85	219.013	1.158	0.433638
2204.4	219.123	1.157	0.450586
2204.87	219.225	1.15358	0.452444
2204.95	219.242	1.153	0.456592
2206.05	219.484	1.141	0.439447
2207.15	219.747	1.142	0.447431
2208.17	219.995	1.12602	0.443869
2208.25	220.014	1.125	0.460474
2209.16	220.239	1.11607	0.447994
2210.37	220.524	1.09946	0.432145
2210.45	220.542	1.098	0.425825
2211.55	220.788	1.093	0.385516
2212.65	221.015	1.075	0.450091
2213.75	221.235	1.065	0.425653
2214.77	221.443	1.05502	0.430731
2214.85	221.459	1.054	0.456609
2215.95	221.683	1.041	0.458486
2217.05	221.92	1.026	0.464924
2219.8	222.644	0.991	0.473344
2220.27	222.791	0.986727	0.442184
2220.9	222.996	0.978	0.471046
2222	223.403	0.966	0.460164
2223.57	223.947	0.940309	0.435989
2223.65	223.976	0.939	0.38926
2224.75	224.353	0.922	0.444421
2225.85	224.717	0.905	0.4362
2226.95	225.057	0.884	0.436708
2228.05	225.367	0.856	0.405912
2229.07	225.641	0.825473	0.441999
2230.25	225.967	0.797	0.447862
2232.45	226.635	0.767	0.438797
2233	226.797	0.776	0.443928
2233.51	226.94	0.790836	0.447133
2234.1	227.09	0.791	0.418989
2235.74	227.48	0.801945	0.493624
2235.75	227.482	0.802	0.48341
2236.77	227.719	0.802709	0.513165
2236.85	227.737	0.803	0.448643
2237.87	228.001	0.812309	0.472963
2237.95	228.023	0.811	0.44263
2238.5	228.173	0.819	0.424857
2240.7	228.787	0.837	0.423928
2241.8	229.12	0.86	0.412091
2242.9	229.447	0.867	0.418724
2244	229.786	0.892	0.458855
2245.1	230.13	0.9	0.41758
2246.2	230.459	0.889	0.433922
2248.4	231.029	0.84	0.410489
2249.5	231.308	0.87	0.425908
2252.25	232.102	0.916	0.44242
2254.45	232.721	0.898	0.43632
2256.1	233.124	0.877	0.416465
2257.2	233.365	0.857	0.429667
2258.85	233.725	0.86	0.443122
2261.62	234.397	0.892855	0.4665
2262.72	234.684	0.890927	0.443
2263.82	234.97	0.883109	0.454
2264.35	235.109	0.886	0.438814
2266	235.556	0.888	0.488053
2266.03	235.564	0.887891	0.4395
2267.12	235.854	0.870255	0.4305
2268.17	236.107	0.871327	0.449
2268.75	236.241	0.871	0.41564
2270.4	236.602	0.879	0.441214
2270.43	236.608	0.878836	0.449
2271.53	236.838	0.869618	0.445
2272.05	236.941	0.863	0.480555
2272.57	237.041	0.863945	0.507
2273.67	237.268	0.863164	0.484
2273.7	237.274	0.863	0.393119
2274.8	237.495	0.856	0.455063
2275.38	237.612	0.861727	0.459
2275.87	237.71	0.857273	0.457
2276	237.736	0.857727	0.444
2276.45	237.828	0.861	0.437079
2278.24	238.185	0.852236	0.458
2279.75	238.485	0.855	0.464562
2280.09	238.552	0.850055	0.455
2281.12	238.749	0.842036	0.4705
2281.4	238.801	0.84	0.435816
2282.53	239.019	0.845455	0.478
2282.57	239.027	0.844727	0.4585
2283.05	239.12	0.836	0.486361
2285.18	239.529	0.822255	0.4585
2285.25	239.542	0.822	0.457853
2285.77	239.639	0.819164	0.481
2286.9	239.857	0.826	0.454579
2288.12	240.08	0.821309	0.484
2289.59	240.359	0.815327	0.4795
2290.32	240.486	0.801564	0.471
2291.85	240.74	0.804	0.493315
2293.03	240.948	0.796273	0.4865
2294.57	241.217	0.789109	0.502
2295.67	241.414	0.776436	0.486
2295.7	241.419	0.776	0.46518
2295.83	241.441	0.774818	0.5
2297.9	241.785	0.755	0.457894
2297.93	241.789	0.754782	0.482
2298.97	241.943	0.746273	0.489
2300.07	242.098	0.741218	0.507
2300.1	242.102	0.741	0.513591
2301.38	242.278	0.740327	0.4875
2302.3	242.397	0.74	0.476627
2302.33	242.4	0.739727	0.501
2303.57	242.54	0.734618	0.5005
2304.53	242.649	0.736	0.518
2305.08	242.714	0.736055	0.506
2305.78	242.796	0.737327	0.5125
2306.15	242.841	0.738	0.530746
2306.18	242.845	0.738	0.52
2306.73	242.915	0.738055	0.4885
2307.28	242.983	0.739	0.525
2307.97	243.072	0.739309	0.529
2308.9	243.198	0.741	0.497356
2310.18	243.381	0.743	0.512
2310.55	243.435	0.743	0.514963
2311.14	243.526	0.742855	0.519
2311.65	243.601	0.741	0.490474
2311.68	243.606	0.741109	0.5
2312.17	243.681	0.742891	0.505
2312.78	243.778	0.745164	0.507
2313.02	243.819	0.746473	0.505
2313.27	243.861	0.747836	0.52
2313.3	243.866	0.748	0.468788
2315.24	244.189	0.742473	0.495
2315.5	244.231	0.742	0.467974
2316.08	244.327	0.744218	0.492
2316.1	244.33	0.744364	0.4925
2316.6	244.417	0.748	0.462238
2317.15	244.515	0.749	0.481823
2317.18	244.52	0.749055	0.484
2317.67	244.609	0.749945	0.468
2318.25	244.714	0.753	0.458461
2318.28	244.719	0.753491	0.478
2318.82	244.824	0.762182	0.4745
2319.35	244.932	0.767	0.446666
2319.93	245.054	0.769782	0.482
2320.45	245.161	0.766	0.470501
2320.48	245.167	0.766164	0.457
2321	245.274	0.769	0.468
2321.03	245.28	0.769218	0.4695
2321.55	245.39	0.773	0.447
2322.07	245.503	0.774891	0.456
2322.68	245.638	0.775218	0.455
2323.2	245.755	0.779	0.471
2323.22	245.76	0.778964	0.463
2324.3	246.016	0.78	0.442809
2324.33	246.024	0.780545	0.4525
2325.4	246.297	0.781	0.463375
2325.43	246.305	0.781273	0.4605
2326.5	246.599	0.786	0.448825
2326.53	246.607	0.786327	0.46
2327.05	246.751	0.792	0.443526
2327.08	246.76	0.792764	0.431
2327.62	246.922	0.806327	0.4365
2328.15	247.087	0.815	0.480379
2328.67	247.257	0.828236	0.437
2328.73	247.277	0.829927	0.402585
2329.18	247.435	0.843836	0.4295
2329.77	247.639	0.834655	0.419
2329.8	247.65	0.834	0.409162
2329.82	247.656	0.833527	0.4275
2329.83	247.66	0.833291	0.411962
2330.35	247.831	0.821	0.422129
2330.93	248.018	0.798909	0.409
2331.45	248.172	0.78	0.427685
2331.97	248.322	0.768655	0.419451
2332	248.331	0.768	0.402107
2332.03	248.339	0.767836	0.4065
2332.03	248.339	0.767836	0.396389
2332.58	248.497	0.764727	0.42
2333.1	248.646	0.76	0.410242
2333.13	248.654	0.760327	0.4145
2333.13	248.654	0.760327	0.411551
2333.65	248.796	0.766	0.441307
2334.23	248.954	0.778873	0.41087
2334.28	248.968	0.780327	0.4205
2334.75	249.098	0.794	0.435402
2334.78	249.107	0.794218	0.432
2335.3	249.257	0.798	0.421807
2335.33	249.266	0.798436	0.417
2335.82	249.408	0.805564	0.421
2336.4	249.585	0.824	0.405547
2336.43	249.594	0.824	0.426
2336.43	249.594	0.824	0.417278
2337.5	249.935	0.832	0.431918
2337.53	249.945	0.832764	0.418
2338.02	250.113	0.845236	0.422
2338.08	250.134	0.8466	0.412
2338.6	250.317	0.857	0.40949
2338.63	250.329	0.857655	0.425
2338.63	250.329	0.857655	0.397585
2339.15	250.522	0.869	0.424567
2339.18	250.534	0.869927	0.41
2339.73	250.742	0.885673	0.412
2340.22	250.932	0.880327	0.424
2340.25	250.943	0.88	0.412748
2340.28	250.955	0.8806	0.406
2340.82	251.162	0.891255	0.4125
2341.32	251.361	0.897618	0.419
2341.9	251.588	0.898	0.378188
2341.93	251.599	0.897891	0.39
2343	251.998	0.898	0.361673
2343.03	252.009	0.898982	0.408
2343.55	252.201	0.916	0.415495
2344.1	252.416	0.936	0.359667
2344.13	252.428	0.936218	0.386419
2344.65	252.633	0.94	0.400109
2344.68	252.645	0.939727	0.395
2345.22	252.854	0.935036	0.4005
2345.23	252.858	0.935055	0.392928
2345.78	253.065	0.935727	0.409
2346.27	253.248	0.931273	0.398
2346.32	253.267	0.931182	0.4025
2346.33	253.27	0.931273	0.3911
2346.85	253.455	0.936	0.39192
2347.43	253.671	0.938382	0.3835
2347.92	253.849	0.944618	0.4
2347.95	253.86	0.945	0.411119
2348.5	254.071	0.948	0.38687
2348.53	254.082	0.947345	0.371628
2349.6	254.477	0.929	0.389669
2349.62	254.484	0.928891	0.392
2349.63	254.488	0.928836	0.372696
2350.15	254.675	0.926	0.411657
2350.73	254.885	0.920709	0.372844
2351.11	255.026	0.929691	0.3735
2351.83	255.306	0.9334	0.382852
2351.88	255.326	0.9324	0.388
2352.93	255.728	0.919055	0.389506
2353.48	255.943	0.919727	0.376259
2354.03	256.159	0.915109	0.369939
2355.13	256.595	0.911455	0.370905
2356.23	257.007	0.891455	0.380374
2357.33	257.388	0.875109	0.383035
2358.43	257.76	0.866618	0.37806
2359.53	258.103	0.865236	0.363768
2360.63	258.439	0.833127	0.400937
2361.73	258.759	0.8064	0.399
2362.83	259.104	0.774073	0.391258
2363.93	259.465	0.758818	0.41939
2367.23	260.734	0.812491	0.4319
2368.35	261.156	0.833636	0.413
2370.55	262.077	0.802273	0.417
2371.63	262.486	0.808764	0.408199
2372.75	262.915	0.838545	0.416
2373.85	263.348	0.835091	0.419
2374.95	263.769	0.819727	0.425
2376.03	264.182	0.796727	0.413286
2380.43	265.787	0.895382	0.404683
2384.83	267.425	0.995036	0.402101
2386.5	268.093	1.05855	0.405
2389.23	269.178	1.10176	0.410396
2393.63	271.057	1.16482	0.401514
2398.03	273.028	1.22856	0.390048
2402.43	274.9	1.24522	0.389866
2405.75	276.21	1.25573	0.419
2406.83	276.64	1.24211	0.399084
2407.95	277.098	1.232	0.413
2409.05	277.563	1.22864	0.424
2411.23	278.406	1.23387	0.408047
2415.63	280.133	1.23949	0.40438
2418.95	281.357	1.24109	0.426
2420.05	281.753	1.23673	0.4165
2422.25	282.45	1.22545	0.413
2423.35	282.766	1.24218	0.434
2424.45	283.101	1.24073	0.413883
2425.55	283.444	1.26345	0.43
2426.65	283.794	1.24509	0.431
2427.75	284.13	1.24664	0.42
2428.85	284.468	1.24373	0.4415
2429.95	284.811	1.24064	0.441
2431.05	285.158	1.23473	0.445
2433.25	285.858	1.22545	0.408945
2437.65	287.131	1.20382	0.416439
2439.85	287.711	1.18764	0.432
2440.95	287.995	1.18191	0.442
2442.05	288.295	1.17464	0.432
2443.15	288.601	1.16854	0.425
2444.25	288.914	1.15964	0.43
2446.45	289.512	1.13609	0.406042
2447.55	289.813	1.13227	0.428
2448.65	290.103	1.11782	0.42
2450.85	290.658	1.08436	0.422
2451.95	290.923	1.07636	0.426
2455.25	291.772	1.086	0.435
2456.35	292.09	1.09009	0.432
2458.55	292.829	1.08754	0.444
2460.75	293.678	1.08754	0.406993
2465.15	295.497	1.06864	0.388
2469.55	297.106	1.05045	0.401102
2473.95	298.937	1.03709	0.381134
2482.74	302.367	1.03671	0.3595
2487.14	303.824	1.021	0.394
2504.74	310.446	0.994345	0.4005
2509.14	312.107	0.979	0.4395
2513.54	313.785	0.950509	0.427
2517.94	315.371	0.949491	0.4275
2526.74	318.404	1.00138	0.451
2531.14	320.335	1.07414	0.4205
2544.34	324.655	1.09922	0.474
2548.74	325.905	1.11093	0.47
2553.14	327.048	1.10178	0.474
2555.85	327.739	1.093	0.459539
2555.85	327.739	1.093	0.491845
2556.95	328.029	1.086	0.491845
2558.05	328.325	1.078	0.489704
2559.15	328.613	1.069	0.461557
2561.35	329.21	1.053	0.476306
2561.9	329.361	1.048	0.376275
2563.55	329.774	1.034	0.47199
2564.1	329.912	1.028	0.466
2565.2	330.194	1.019	0.446
2566.34	330.475	1.00656	0.425
2567.95	330.852	0.991	0.459442
2570.15	331.355	0.968	0.46077
2570.74	331.499	0.962491	0.4755
2571.25	331.626	0.956	0.472859
2572.9	332.042	0.941	0.456562
2574.55	332.467	0.924	0.505533
2575.14	332.613	0.919345	0.4515
2576.2	332.848	0.907	0.424262
2577.85	333.182	0.887	0.481679
2580.6	333.67	0.857	0.506391
2580.9	333.722	0.854273	0.528579
2582.25	333.964	0.842	0.538738
2583.35	334.159	0.836	0.513247
2583.94	334.261	0.834	0.492
2583.94	334.261	0.834	0.492
2584.3	334.323	0.834	0.526274
2585.26	334.494	0.832945	0.503013
2585.55	334.548	0.834	0.504924
2586.86	334.794	0.833618	0.514745
2587.2	334.858	0.833	0.501655
2588.3	335.053	0.831	0.494574
2588.34	335.06	0.831	0.508
2588.7	335.126	0.831	0.4954
2589.95	335.363	0.83	0.49452
2590.5	335.469	0.828	0.489463
2591.97	335.779	0.83	0.477256
2592.15	335.818	0.83	0.514693
2592.74	335.954	0.828	0.508
2593.25	336.076	0.828	0.486722
2593.88	336.234	0.829564	0.494669
2594.12	336.297	0.828255	0.485184
2594.9	336.509	0.834	0.47642
2595.42	336.661	0.834	0.474513
2596.03	336.844	0.835109	0.467276
2596.31	336.931	0.836127	0.466843
2596.55	337.006	0.837	0.42883
2597.1	337.182	0.844	0.485592
2597.65	337.368	0.845	0.450297
2599.3	337.942	0.837	0.447981
2599.36	337.964	0.836891	0.468292
2599.85	338.143	0.836	0.428856
2600.82	338.504	0.855218	0.461889
2600.95	338.554	0.859	0.448145
2601.5	338.771	0.878	0.420456
2602.02	338.981	0.895018	0.42136
2602.05	338.993	0.896	0.411429
2602.6	339.222	0.917	0.42
2602.63	339.235	0.9182	0.428853
2602.96	339.377	0.9314	0.440494
2603.15	339.459	0.939	0.379862
2603.98	339.831	0.958618	0.444081
2604.8	340.205	0.983	0.435604
2604.83	340.22	0.984309	0.445743
2605.1	340.35	0.996091	0.425699
2605.35	340.47	1.007	0.406557
2605.9	340.742	1.02	0.422295
2605.94	340.762	1.02138	0.4025
2606.02	340.803	1.02415	0.423079
2606.45	341.021	1.039	0.417361
2607.42	341.543	1.09278	0.420924
2607.55	341.615	1.102	0.399789
2608.1	341.942	1.141	0.409591
2609.2	342.627	1.166	0.41526
2609.47	342.795	1.18024	0.401068
2609.75	342.968	1.195	0.429695
2610.3	343.328	1.214	0.409878
2610.34	343.353	1.21349	0.376
2611.4	344.022	1.223	0.413031
2611.95	344.35	1.211	0.405075
2613.05	345.028	1.228	0.411324
2614.15	345.738	1.274	0.408343
2623.54	351.477	1.44378	0.382
2627.94	354.057	1.49029	0.375
2632.34	356.677	1.574	0.406
2641.14	363.022	1.61951	0.35
2645.54	365.846	1.60249	0.3265
2654.34	370.87	1.45406	0.3825
2658.74	373.542	1.32691	0.3655
2667.54	378.432	1.14207	0.3575
2671.94	380.766	1.13958	0.382
2676.34	382.901	1.15336	0.405
2685.14	387.058	1.37202	0.418
2689.54	389.101	1.47824	0.4535
2693.94	391.523	1.76102	0.4095
2702.74	396.081	2.00495	0.43175
2707.14	397.836	2.10231	0.48
2715.94	401.296	2.30053	0.4745
2720.34	402.893	2.36773	0.471
2724.74	404.356	2.40465	0.493333
2729.14	405.792	2.42807	0.49
2737.94	408.791	2.41071	0.481
2740.65	409.699	2.386	0.46553
2741.75	410.067	2.374	0.467112
2742.3	410.25	2.366	0.486123
2742.85	410.438	2.358	0.457735
2743.95	410.815	2.342	0.479642
2744.5	410.996	2.335	0.468214
2745.6	411.357	2.315	0.475376
2746.15	411.542	2.306	0.494546
2746.74	411.74	2.29506	0.4705
2747.25	411.915	2.283	0.483278
2747.8	412.111	2.27	0.495022
2749.45	412.718	2.232	0.498055
2750	412.927	2.219	0.475064
2750.55	413.141	2.204	0.496918
2751.1	413.358	2.19	0.477711
2751.14	413.374	2.18898	0.4455
2752.2	413.787	2.161	0.472419
2752.75	414.005	2.142	0.411909
2753.3	414.239	2.122	0.492188
2754.4	414.715	2.087	0.47108
2755.5	415.189	2.055	0.42095
2755.54	415.206	2.05355	0.4355
2756.05	415.413	2.035	0.459565
2757.7	416.09	1.977	0.463159
2758.25	416.316	1.952	0.44893
2758.8	416.546	1.935	0.463636
2759.94	417.001	1.89247	0.4525
2761	417.426	1.856	0.500419
2762.65	418.078	1.791	0.445521
2763.75	418.517	1.752	0.459385
2764.3	418.738	1.73	0.517809
2765.95	419.412	1.666	0.535213
2766.5	419.653	1.644	0.532465
2768.74	420.696	1.55126	0.45
2769.25	420.926	1.529	0.502479
2770.35	421.465	1.479	0.482007
2770.9	421.737	1.452	0.470774
2771.45	422.014	1.429	0.47088
2772	422.286	1.407	0.457388
2773.1	422.836	1.356	0.516998
2773.14	422.857	1.35404	0.4545
2773.65	423.124	1.329	0.480939
2774.2	423.415	1.307	0.458618
2774.75	423.713	1.279	0.470604
2775.3	424.018	1.251	0.496398
2775.85	424.314	1.227	0.470702
2776.77	424.803	1.18418	0.477551
2776.95	424.9	1.176	0.458758
2777.5	425.199	1.162	0.462762
2777.54	425.219	1.16149	0.4535
2777.85	425.381	1.15755	0.462
2778.05	425.486	1.155	0.483765
2778.6	425.779	1.148	0.488039
2778.99	425.974	1.14446	0.456849
2779.7	426.309	1.136	0.471942
2780.07	426.477	1.12793	0.475495
2780.25	426.558	1.124	0.465171
2780.8	426.816	1.109	0.368873
2781.35	427.082	1.096	0.495954
2782.11	427.482	1.07704	0.4415
2782.45	427.664	1.069	0.494023
2783.4	428.242	1.03964	0.443752
2784.53	428.966	1.00349	0.456127
2785.2	429.457	0.997	0.422007
2785.42	429.631	0.9978	0.428161
2785.75	429.892	0.999	0.425166
2786.3	430.37	1.01	0.380766
2786.34	430.403	1.00956	0.386
2786.68	430.684	1.00585	0.418035
2786.85	430.825	1.004	0.432583
2787.4	431.353	1.015	0.443449
2787.82	431.774	1.015	0.401618
2787.95	431.904	1.015	0.392038
2788.86	432.9	1.03327	0.37843
2789.05	433.112	1.035	0.380626
2789.6	433.74	1.041	0.412329
2789.87	434.046	1.03855	0.405732
2790.15	434.363	1.036	0.388059
2790.7	434.978	1.035	0.38665
2791.25	435.568	1.017	0.421248
2791.8	436.136	1.014	0.361755
2792.07	436.457	1.03953	0.40652
2792.35	436.789	1.066	0.378549
2793.15	437.778	1.09482	0.4032
2793.45	438.142	1.103	0.381894
2794	438.801	1.109	0.388387
2794.55	439.38	1.162	0.378657
2795.31	440.226	1.25438	0.36
2795.65	440.63	1.289	0.394072
2796.2	441.302	1.327	0.39746
2796.75	441.951	1.368	0.410794
2797.85	443.262	1.469	0.413794
2799.59	445.323	1.59042	0.38
2803.99	450.341	1.8096	0.392
2805.825	452.359	1.8945	0.362154
2808.025	454.929	1.953	0.364476
2808.39	455.326	1.95532	0.3615
2810.225	457.436	1.9795	0.359776
2812.425	459.9	1.988	0.35835
2812.78	460.344	1.99031	0.366
2814.625	462.709	1.971	0.362227
2816.825	465.366	1.9195	0.375581
2817.19	465.771	1.90987	0.3755
2819.025	467.783	1.8605	0.37925
2821.225	470.359	1.806	0.369883
2821.59	470.77	1.79799	0.399
2823.425	472.797	1.7375	0.405324
2825.625	474.867	1.6715	0.406181
2825.99	475.163	1.66153	0.431
2827.825	476.719	1.6095	0.41443
2830.025	478.854	1.5465	0.370808
2830.39	479.166	1.53737	0.4185
2832.225	480.632	1.491	0.41013
2834.425	482.498	1.456	0.418081
2834.8	482.803	1.44848	0.4125
2836.625	484.22	1.4345	0.410612
2838.825	485.79	1.4255	0.408506
2839.19	486.044	1.42616	0.4475
2841.025	487.281	1.427	0.428832
2843.225	488.767	1.4255	0.421424
2843.59	489.014	1.42351	0.468
2845.975	490.578	1.411	0.419812
2847.99	491.851	1.40051	0.4315
2848.175	491.968	1.3995	0.437289
2850.925	493.733	1.3965	0.425191
2852.39	494.703	1.39985	0.4265
2853.125	495.192	1.4	0.41641
2855.325	496.647	1.417	0.404764
2856.79	497.642	1.42982	0.4495
2857.525	498.138	1.4375	0.415427
2861.19	500.627	1.48098	0.426
2861.925	501.119	1.489	0.433454
2865.225	503.364	1.532	0.418726
2865.61	503.628	1.53679	0.4215
2867.425	504.805	1.551	0.447043
2869.625	506.188	1.566	0.417064
2869.99	506.411	1.57085	0.4325
2870.45	506.709	1.581	0.434012
2871.825	507.656	1.594	0.405986
2873.75	508.958	1.59	0.457636
2874.025	509.145	1.5885	0.399023
2874.3	509.331	1.587	0.435931
2874.39	509.389	1.58777	0.425
2874.85	509.709	1.592	0.482119
2875.4	510.106	1.598	0.414748
2875.95	510.537	1.603	0.431557
2876.225	510.751	1.602	0.414184
2876.5	510.965	1.601	0.392171
2877.6	511.799	1.594	0.44212
2878.15	512.209	1.59	0.407926
2878.425	512.415	1.589	0.426493
2878.7	512.622	1.588	0.428
2878.79	512.69	1.58833	0.422
2879.25	513.038	1.59	0.426788
2880.35	513.869	1.58	0.434049
2880.625	514.071	1.5775	0.407207
2881.45	514.675	1.569	0.419259
2882	515.074	1.57	0.434913
2882.825	515.672	1.559	0.422184
2883.1	515.869	1.557	0.460538
2883.18	515.927	1.55546	0.418
2883.65	516.246	1.547	0.455464
2884.75	517.02	1.539	0.445532
2885.025	517.216	1.537	0.418883
2885.3	517.411	1.535	0.450381
2885.85	517.787	1.524	0.430307
2886.4	518.154	1.52	0.448338
2887.225	518.716	1.516	0.430313
2887.59	518.97	1.51351	0.44
2888.05	519.288	1.511	0.412595
2889.15	520.021	1.498	0.45745
2889.975	520.571	1.485	0.440989
2890.25	520.751	1.482	0.459485
2891.35	521.482	1.47	0.466693
2891.99	521.904	1.46338	0.4285
2892.45	522.216	1.46	0.421304
2892.725	522.401	1.4555	0.453485
2893	522.587	1.451	0.412677
2893.55	522.954	1.444	0.440149
2894.1	523.323	1.434	0.459573
2894.65	523.694	1.427	0.418978
2894.925	523.896	1.429	0.428518
2895.75	524.498	1.428	0.470675
2896.3	524.897	1.429	0.377808
2896.41	524.98	1.42837	0.4275
2896.85	525.291	1.426	0.442782
2897.125	525.497	1.429	0.420788
2897.4	525.703	1.432	0.453545
2897.95	526.151	1.433	0.416483
2899.05	527.031	1.431	0.391881
2899.325	527.247	1.4335	0.417957
2899.6	527.462	1.436	0.347579
2900.15	527.892	1.433	0.421105
2900.7	528.33	1.44	0.431999
2900.79	528.402	1.43869	0.4485
2901.25	528.765	1.432	0.451129
2901.525	528.979	1.433	0.412249
2901.8	529.192	1.434	0.414939
2902.35	529.634	1.434	0.374085
2903.45	530.528	1.429	0.394261
2903.725	530.744	1.4255	0.407895
2904	530.961	1.422	0.4024
2904.55	531.405	1.421	0.418496
2905.1	531.846	1.418	0.417911
2905.18	531.912	1.41846	0.4035
2905.65	532.275	1.421	0.401652
2905.925	532.486	1.4195	0.397453
2906.2	532.697	1.418	0.396387
2906.75	533.128	1.419	0.396204
2907.3	533.564	1.417	0.41904
2907.85	534.027	1.422	0.398843
2908.4	534.502	1.417	0.37323
2908.95	535.005	1.417	0.377511
2909.225	535.274	1.422	0.393301
2909.59	535.634	1.42864	0.3675
2910.05	536.106	1.437	0.369019
2910.6	536.659	1.445	0.381765
2911.15	537.237	1.45	0.362253
2913.99	540.012	1.46066	0.3835
2918.39	544.025	1.48177	0.379
2922.78	547.862	1.50946	0.397
2927.23	551.467	1.50724	0.398
2931.59	554.363	1.5068	0.449
2935.99	557.024	1.50418	0.4215
2940.38	559.078	1.52331	0.445
2944.79	561.359	1.59515	0.4115
2949.19	563.455	1.612	0.431
2953.59	565.173	1.62767	0.4515
2957.99	566.761	1.63816	0.44
2962.39	568.143	1.65267	0.4445
2966.79	569.449	1.66516	0.4675
2971.19	570.878	1.672	0.4425
2975.59	572.35	1.67131	0.41525
2979.99	573.802	1.66767	0.447
2984.39	575.431	1.65484	0.4365
2988.79	577.226	1.63616	0.4515
2993.19	579.342	1.61551	0.4455
2997.59	581.674	1.56669	0.4535
3001.99	584.983	1.48836	0.377
3006.39	589.496	1.43186	0.426
3010.79	594.131	1.36953	0.4395
3015.06	599.514	1.304	0.415025
3015.19	599.718	1.30269	0.394
3015.62	600.426	1.29629	0.399978
3016.12	601.188	1.28902	0.404103
3016.72	602.069	1.28415	0.438157
3017.26	602.855	1.28306	0.425573
3017.82	603.643	1.27625	0.414051
3018.38	604.376	1.27793	0.414222
3018.91	605.108	1.28449	0.44993
3019.47	605.909	1.28693	0.452117
3020.03	606.678	1.28507	0.433999
3020.58	607.449	1.28596	0.461468
3021.12	608.202	1.28696	0.454097
3021.66	608.912	1.28329	0.459864
3022.22	609.663	1.283	0.462676
3022.78	610.397	1.27625	0.459009
3023.31	611.049	1.27415	0.451374
3023.88	611.739	1.27978	0.450234
3023.99	611.871	1.28049	0.4675
3024.43	612.4	1.28289	0.458486
3024.97	613.048	1.28589	0.479655
3025.53	613.68	1.28793	0.482808
3027.76	616.249	1.28902	0.483067
3028.43	617.022	1.29024	0.48
3028.83	617.472	1.29096	0.486045
3029.38	618.104	1.291	0.445287
3029.93	618.742	1.29389	0.427872
3030.45	619.363	1.29122	0.424009
3031.03	620.022	1.29293	0.465963
3031.56	620.648	1.29949	0.484235
3032.1	621.302	1.30727	0.454455
3032.79	622.172	1.32131	0.4675
3033.76	623.395	1.33727	0.463275
3034.3	624.086	1.34356	0.429781
3034.88	624.788	1.35171	0.44842
3035.43	625.474	1.35875	0.446855
3035.98	626.17	1.36574	0.448534
3036.53	626.883	1.37564	0.457504
3037.06	627.589	1.38342	0.451726
3037.19	627.762	1.38482	0.445
3037.62	628.346	1.38882	0.452385
3038.7	629.739	1.40171	0.445857
3039.28	630.489	1.41742	0.405411
3040.37	632.157	1.45664	0.384885
3040.47	632.326	1.46284	0.36
3040.91	633.145	1.49602	0.387048
3041.47	634.326	1.54044	0.380107
3041.59	634.552	1.54741	0.392
3042.01	635.472	1.57445	0.395238
3042.67	636.898	1.59967	0.376
3042.94	637.474	1.61036	0.381798
3044.2	640.151	1.70446	0.373817
3044.86	641.483	1.74526	0.359333
3045.88	643.543	1.84115	0.372394
3045.99	643.755	1.85026	0.3865
3046.41	644.615	1.88658	0.381136
3046.97	645.683	1.92309	0.39787
3047.07	645.853	1.92854	0.371
3047.51	646.629	1.95282	0.391588
3048.08	647.605	1.99547	0.373217
3048.61	648.514	2.03224	0.371436
3049.18	649.489	2.07644	0.380629
3049.24	649.59	2.08011	0.358
3049.7	650.373	2.10489	0.384419
3050.19	651.165	2.13318	0.38264
3050.39	651.467	2.14595	0.3845
3050.74	652.052	2.175	0.397344
3051.37	653.096	2.20858	0.385993
3051.47	653.255	2.21426	0.36575
3051.91	654	2.24338	0.309664
3052.9	655.678	2.28616	0.332903
3053.58	656.736	2.30256	0.37957
3053.66	656.865	2.30477	0.361
3054.11	657.543	2.31718	0.398138
3054.66	658.345	2.33747	0.381677
3054.78	658.536	2.34225	0.378667
3055.22	659.223	2.35924	0.36411
3055.78	660.112	2.37831	0.371344
3055.86	660.251	2.38054	0.3545
3056.15	660.719	2.38727	0.344235
3056.87	661.915	2.41091	0.357548
3057.43	662.86	2.42645	0.354209
3058.07	663.864	2.43618	0.329
3058.53	664.565	2.44464	0.353669
3059.18	665.585	2.46416	0.3735
3059.61	666.272	2.47498	0.345028
3060.18	667.219	2.49045	0.352621
3060.26	667.36	2.49242	0.374
3060.72	668.133	2.50256	0.38514
3061.83	669.921	2.51396	0.392556
3062.37	670.74	2.514	0.358607
3062.47	670.876	2.51364	0.362
3062.93	671.524	2.51111	0.379992
3063.45	672.19	2.51191	0.39997
3063.59	672.365	2.512	0.3825
3064.03	672.944	2.512	0.377261
3064.58	673.651	2.51296	0.385903
3064.64	673.731	2.51344	0.405
3065.12	674.391	2.51878	0.410245
3065.56	674.98	2.51527	0.367096
3066.22	675.901	2.52074	0.400688
3066.76	676.619	2.52285	0.369437
3066.86	676.759	2.52347	0.3665
3067.32	677.359	2.52678	0.390356
3067.87	678.07	2.52511	0.443021
3067.99	678.214	2.52438	0.4
3068.32	678.63	2.52195	0.40541
3068.97	679.419	2.52293	0.42746
3069.07	679.517	2.52229	0.403
3069.53	680.048	2.51722	0.416624
3070.08	680.635	2.51411	0.392135
3070.62	681.226	2.514	0.40679
3071.05	681.698	2.51691	0.388167
3071.26	681.944	2.51812	0.3755
3071.72	682.494	2.51896	0.391697
3072.24	683.081	2.51264	0.383416
3072.39	683.226	2.51092	0.4095
3072.82	683.691	2.50526	0.415424
3073.47	684.285	2.49876	0.407
3073.93	684.734	2.49707	0.431129
3074.45	685.27	2.497	0.35687
3075.03	685.865	2.49893	0.402093
3075.58	686.461	2.49707	0.36817
3075.67	686.56	2.49726	0.3765
3076.12	687.068	2.49893	0.387428
3076.67	687.648	2.49522	0.394387
3076.78	687.767	2.49376	0.4005
3077.1	688.09	2.48918	0.405513
3077.78	688.749	2.47929	0.402581
3077.86	688.827	2.47888	0.3955
3078.33	689.244	2.47804	0.414311
3079.43	690.206	2.48	0.413568
3079.97	690.683	2.47807	0.397951
3080.07	690.759	2.47775	0.412
3080.53	691.146	2.47607	0.421257
3081.18	691.676	2.47384	0.415
3081.62	692.03	2.47304	0.411392
3082.18	692.456	2.47204	0.3932
3082.24	692.501	2.47193	0.4105
3082.72	692.875	2.47104	0.419152
3084.47	694.154	2.464	0.413
3084.9	694.466	2.464	0.434115
3085.47	694.874	2.46207	0.435828
3085.59	694.95	2.46151	0.4315
3086.03	695.251	2.45911	0.436687
3086.58	695.625	2.45707	0.431297
3086.66	695.682	2.45688	0.4105
3087.1	695.975	2.45609	0.437354
3087.68	696.366	2.45696	0.43076
3088.22	696.736	2.45315	0.436678
3088.78	697.093	2.45011	0.432173
3088.86	697.147	2.44988	0.4075
3089.32	697.436	2.44905	0.432985
3089.87	697.78	2.44616	0.437027
3089.99	697.856	2.44567	0.4255
3090.43	698.134	2.44407	0.443955
3090.97	698.463	2.44207	0.439418
3091.07	698.513	2.44153	0.4225
3091.53	698.784	2.43815	0.431426
3092.08	699.109	2.43704	0.443377
3092.62	699.435	2.43315	0.440274
3093.16	699.735	2.42929	0.44568
3093.26	699.795	2.42876	0.414
3093.71	700.048	2.42714	0.41701
3094.27	700.362	2.42511	0.438385
3094.39	700.427	2.42467	0.4335
3094.81	700.649	2.42314	0.433219
3095.47	700.998	2.422	0.431
3095.93	701.253	2.422	0.428751
3097.03	701.85	2.418	0.450337
3097.66	702.198	2.41388	0.427
3098.1	702.435	2.41309	0.447692
3098.78	702.807	2.40984	0.439
3099.22	703.05	2.40904	0.430852
3099.87	703.397	2.40462	0.4415
3100.33	703.644	2.40211	0.455223
3100.88	703.941	2.40007	0.430462
3101.41	704.232	2.39814	0.438802
3101.97	704.545	2.39511	0.452919
3102.07	704.592	2.39453	0.4375
3102.53	704.845	2.39114	0.452343
3102.99	705.104	2.38936	0.455186
3103.18	705.206	2.38838	0.4425
3104.18	705.757	2.38307	0.432465
3104.26	705.805	2.38265	0.4285
3104.57	705.982	2.38093	0.437152
3105.28	706.384	2.37711	0.436987
3105.56	706.548	2.37606	0.440865
3106.37	707.025	2.37027	0.468052
3106.54	707.124	2.36925	0.43
3106.93	707.357	2.36711	0.444138
3107.47	707.678	2.36218	0.459239
3107.53	707.71	2.36174	0.44
3108.58	708.308	2.35222	0.438712
3108.74	708.397	2.35075	0.445
3109.12	708.619	2.34718	0.454186
3109.68	708.941	2.34507	0.459676
3110.22	709.272	2.33922	0.449628
3110.76	709.592	2.33344	0.454971
3110.97	709.717	2.33178	0.437
3111.33	709.937	2.32915	0.45718
3111.87	710.272	2.32238	0.431193
3111.93	710.313	2.32156	0.441
3112.97	710.991	2.31311	0.432102
3113.08	711.067	2.3127	0.4335
3113.5	711.348	2.31118	0.448681
3114.08	711.748	2.30714	0.423241
3114.62	712.133	2.30227	0.425352
3115.18	712.535	2.29718	0.433929
3115.39	712.688	2.29525	0.4215
3115.72	712.931	2.29218	0.437578
3116.34	713.365	2.28681	0.4365
3116.86	713.746	2.28395	0.423813
3117.38	714.14	2.28111	0.395743
3117.43	714.178	2.28073	0.424
3117.69	714.375	2.27836	0.431809
3119.04	715.414	2.26511	0.435987
3119.79	716.01	2.25935	0.4245
3120.05	716.22	2.25982	0.452653
3120.68	716.725	2.25518	0.385393
3120.74	716.769	2.25487	0.4285
3121.22	717.157	2.25307	0.403511
3121.76	717.581	2.25207	0.37144
3121.93	717.73	2.25249	0.384
3122.18	717.942	2.25338	0.395896
3122.86	718.532	2.25493	0.395357
3123.45	719.057	2.258	0.386052
3124.15	719.739	2.25861	0.4025
3125.08	720.632	2.27649	0.419566
3125.14	720.689	2.27814	0.419
3125.61	721.194	2.29369	0.438776
3126.15	721.797	2.29046	0.400024
3126.35	721.991	2.28839	0.411
3126.73	722.347	2.28422	0.403325
3127.28	722.875	2.29942	0.39709
3127.83	723.439	2.30385	0.401396
3128.38	723.958	2.30015	0.373824
3128.54	724.104	2.303	0.386333
3128.93	724.466	2.31156	0.428601
3129.44	724.979	2.32109	0.407224
3129.53	725.063	2.32245	0.4045
3129.76	725.285	2.32531	0.394764
3130.55	726.069	2.33082	0.410578
3130.74	726.253	2.332	0.382667
3131.12	726.637	2.33486	0.392415
3131.67	727.139	2.34067	0.363932
3131.98	727.425	2.34558	0.388739
3132.78	728.197	2.36571	0.417597
3133.01	728.417	2.36864	0.384
3133.22	728.631	2.37134	0.397224
3133.93	729.317	2.367	0.4125
3134.43	729.753	2.367	0.405964
3135.14	730.364	2.37125	0.387
3135.53	730.699	2.37196	0.408691
3136.08	731.186	2.37778	0.363316
3136.62	731.68	2.378	0.410962
3137.18	732.167	2.37896	0.392928
3137.34	732.314	2.37975	0.388
3137.72	732.684	2.38189	0.395241
3138.28	733.172	2.37814	0.377818
3138.34	733.222	2.37819	0.401
3138.67	733.533	2.38002	0.391385
3139.38	734.226	2.381	0.417273
3139.53	734.376	2.38051	0.38
3139.88	734.708	2.37926	0.395326
3140.47	735.308	2.37711	0.400644
3141.03	735.912	2.38278	0.377877
3141.58	736.576	2.38493	0.353156
3141.76	736.8	2.38556	0.3565
3142.12	737.283	2.38693	0.354334
3142.78	738.153	2.38759	0.37
3143.22	738.779	2.38511	0.361007
3143.77	739.514	2.39256	0.368956
3143.93	739.741	2.39423	0.3695
3144.33	740.287	2.39782	0.377848
3145.43	741.864	2.40786	0.363532
3145.97	742.653	2.40704	0.370094
3146.14	742.872	2.40626	0.3715
3146.53	743.428	2.40411	0.36361
3147.14	744.285	2.40614	0.3715
3147.53	744.855	2.4076	0.383715
3148.18	745.762	2.408	0.370682
3148.34	745.983	2.408	0.372
3148.57	746.331	2.408	0.364525
3149.28	747.343	2.40607	0.392751
3149.83	748.146	2.40407	0.380376
3150.36	748.92	2.404	0.374958
3150.55	749.191	2.40347	0.37
3150.9	749.724	2.40214	0.384725
3151.48	750.569	2.40104	0.399636
3152.03	751.403	2.39715	0.402302
3152.55	752.195	2.40064	0.394961
3152.76	752.505	2.40241	0.373
3153.11	753.04	2.40564	0.388565
3153.68	753.902	2.40504	0.41095
3154.77	755.538	2.40789	0.402452
3154.84	755.634	2.40781	0.3765
3155.33	756.361	2.40511	0.418861
3155.88	757.155	2.40596	0.387202
3155.93	757.234	2.40556	0.392
3156.43	757.933	2.39926	0.385144
3157.14	758.86	2.38815	0.3725
3157.93	759.796	2.37886	0.416386
3158.62	760.642	2.37315	0.430591
3159.18	761.342	2.37107	0.404212
3159.24	761.426	2.37116	0.396
3159.7	762.024	2.37282	0.42456
3160.34	762.891	2.37806	0.4235
3160.83	763.631	2.37896	0.418966
3161.33	764.405	2.38249	0.429887
3161.6	764.819	2.38192	0.424
3161.93	765.333	2.38011	0.409761
3162.3	765.888	2.37745	0.374069
3163.55	767.634	2.36927	0.410642
3164.11	768.39	2.36522	0.430371
3164.24	768.541	2.36484	0.41875
3164.67	769.113	2.36406	0.399703
3165.22	769.882	2.364	0.441621
3165.78	770.676	2.36689	0.402246
3165.95	770.931	2.36753	0.4065
3166.32	771.531	2.36893	0.413034
3166.86	772.375	2.36993	0.423934
3167.41	773.239	2.37473	0.439518
3167.97	774.058	2.375	0.391116
3168.53	774.815	2.375	0.436587
3168.64	774.953	2.37531	0.428
3169.06	775.507	2.37685	0.443458
3170.18	776.992	2.39267	0.434168
3171.28	778.553	2.41171	0.385663
3171.83	779.322	2.41874	0.437393
3172.36	780.052	2.42562	0.423865
3172.55	780.281	2.42758	0.4395
3172.93	780.784	2.43178	0.459881
3173.47	781.475	2.44067	0.446262
3173.53	781.543	2.44176	0.451
3173.86	781.946	2.44886	0.447498
3174.55	782.803	2.46482	0.450584
3174.74	783.032	2.46944	0.437
3175.13	783.52	2.47949	0.452257
3175.61	784.111	2.49709	0.446279
3176.23	784.84	2.51927	0.454965
3176.99	785.755	2.55228	0.4415
3177.28	786.099	2.56731	0.435973
3177.96	786.926	2.59862	0.4715
3178.43	787.491	2.61913	0.464215
3178.97	788.139	2.64987	0.460742
3179.14	788.323	2.65812	0.4525
3179.53	788.791	2.67895	0.470827
3180.62	790.066	2.73605	0.475086
3181.19	790.675	2.77235	0.46602
3181.39	790.885	2.78612	0.4635
3181.71	791.235	2.80916	0.476732
3182.28	791.843	2.84573	0.48877
3182.34	791.901	2.84986	0.477
3182.82	792.41	2.88955	0.454523
3183.36	793.006	2.94949	0.456936
3183.58	793.263	2.97593	0.433
3184.47	794.353	3.08556	0.444292
3185.02	795.037	3.16174	0.436231
3185.55	795.739	3.24782	0.429167
3185.74	795.995	3.28128	0.42
3186.12	796.548	3.35526	0.425827
3186.65	797.319	3.47082	0.408492
3186.81	797.567	3.5082	0.416
3187.06	797.961	3.56774	0.427786
3187.78	799.145	3.74456	0.399409
3187.93	799.391	3.78726	0.415
3188.18	799.809	3.86031	0.393032
3190.53	804.478	4.81144	0.439
3191.14	805.8	5.06884	0.4265
3194.94	809.304	5.812	0.407
3199.33	809.304	5.812	0.421
3203.73	809.304	5.812	0.4195
3208.14	809.304	5.812	0.443
3212.37	809.304	5.812	0.428
3216.94	809.304	5.812	0.4945
3221.34	809.304	5.812	0.4245
3230.14	809.304	5.812	0.4015
3234.54	809.304	5.812	0.403
3238.93	809.304	5.812	0.4125
3243.32	809.304	5.812	0.395
3247.74	809.304	5.812	0.3925

## Sheet: Grisart
A. Grisart (2020-2021)
bag EDC	depth [m]	gas age AICC2023 [ka BP]	gas age uncertainty AICC2023 [kyr]	δ15N [‰]
2709	1489.95	110.49	0.833	0.396626
2714	1492.7	110.831	0.828	0.430092
2718	1494.9	111.108	0.814	0.424696
2722	1497.1	111.388	0.822	0.411233
2727	1499.85	111.728	0.817	0.431556
2731	1502.05	111.991	0.814	0.442967
2736	1504.8	112.336	0.801	0.438859
2741	1507.55	112.699	0.797	0.442482
2746	1510.3	113.036	0.786	0.439683
2756	1515.8	113.587	0.791	0.445762
2762	1519.1	113.954	0.803	0.433331
2767	1521.85	114.26	0.819	0.444744
2772	1524.6	114.615	0.821	0.467381
2778	1527.9	115.018	0.815	0.452098
2784	1531.2	115.382	0.79	0.456866
2790	1534.5	115.681	0.787	0.466682
2796	1537.8	115.98	0.789	0.479784
2809	1544.95	116.694	0.768	0.44385
2815	1548.25	116.983	0.775	0.469296
2822	1552.1	117.314	0.772	0.481133
2835	1559.25	118.012	0.761	0.494298
2848	1566.4	118.593	0.741	0.487097
2855	1570.25	118.863	0.742	0.515212
2861	1573.55	119.17	0.733	0.491448
2875	1581.25	119.922	0.711	0.425691
2883	1585.65	120.246	0.7	0.510189
2887	1587.85	120.386	0.704	0.49036
2889	1588.95	120.458	0.712	0.49154
2903	1596.65	120.967	0.721	0.502308
2910	1600.5	121.286	0.732	0.47138
2917	1604.35	121.606	0.732	0.467435
2924	1608.2	121.869	0.737	0.473134
2945	1619.75	122.618	0.735	0.459505
2952	1623.6	122.858	0.746	0.465786
2960	1628	123.149	0.754	0.491435
2981	1639.55	124.066	0.751	0.409037
2995	1647.25	124.563	0.75	0.488761
3002	1651.1	124.813	0.745	0.503708
3009	1654.95	125.066	0.736	0.480982
3015	1658.25	125.266	0.742	0.456878
3031	1667.05	125.877	0.748	0.468584
3038	1670.9	126.14	0.749	0.489577
3046	1675.3	126.512	0.751	0.426702
3054	1679.7	126.856	0.742	0.462668
3062	1684.1	127.184	0.758	0.497449
3103	1706.65	128.716	0.71	0.528787
3110	1710.5	128.943	0.71	0.509523
3118	1714.9	129.191	0.712	0.501468
3132	1722.6	129.635	0.731	0.51793
3139	1726.45	129.86	0.734	0.519916
3146	1730.3	130.1	0.747	0.50256
3152	1733.6	130.309	0.767	0.5113
3168	1742.4	130.818	0.782	0.518601
3173	1745.15	130.998	0.786	0.527389
3178	1747.9	131.225	0.8	0.503157
3183	1750.65	131.462	0.816	0.430976
3189	1753.95	131.706	0.819	0.493729
3192	1755.6	131.83	0.828	0.488325
3197	1758.35	132.064	0.842	0.472579
3202	1761.1	132.355	0.858	0.46838
3209	1764.95	132.745	0.865	0.462776
3212	1766.6	132.901	0.878	0.441364
3216	1768.8	133.13	0.896	0.510724
3219	1770.45	133.342	0.905	0.44379
3222	1772.1	133.571	0.922	0.430461
3225	1773.75	133.79	0.929	0.415977
3228	1775.4	134.006	0.915	0.417132
3231	1777.05	134.229	0.94	0.427759
3240	1782	134.971	0.965	0.40462
3243	1783.65	135.256	0.979	0.369314
3245	1784.75	135.451	0.995	0.382372
3248	1786.4	135.767	1.018	0.412387
3252	1788.6	136.213	1.007	0.385564
3253	1789.15	136.318	1.008	0.368034
3629	1995.95	179.174	1.042	0.406644
3685	2026.75	186.738	1.267	0.436955
3691	2030.05	187.446	1.275	0.360255
3693	2031.15	187.689	1.279	0.426422
3696	2032.8	188.059	1.275	0.388329
3699	2034.45	188.409	1.261	0.455405
3702	2036.1	188.749	1.255	0.409269
3707	2038.85	189.239	1.233	0.36939
3709	2039.95	189.406	1.226	0.460878
3712	2041.6	189.648	1.211	0.431596
3714	2042.7	189.798	1.207	0.458816
3717	2044.35	190.049	1.219	0.443524
3720	2046	190.35	1.218	0.444212
3723	2047.65	190.701	1.213	0.437416
3731	2052.05	191.753	1.21	0.450208
3732	2052.6	191.901	1.198	0.406004
3733	2053.15	192.046	1.209	0.446259
3736	2054.8	192.525	1.221	0.370001
3738	2055.9	192.818	1.216	0.416219
3741	2057.55	193.205	1.207	0.417849
3743	2058.65	193.425	1.201	0.37885
3746	2060.3	193.696	1.181	0.421055
3749	2061.95	193.93	1.169	0.423422
3752	2063.6	194.181	1.191	0.468617
3757	2066.35	194.752	1.184	0.430971
3760	2068	195.156	1.209	0.433515
3763	2069.65	195.576	1.202	0.417566
3766	2071.3	195.975	1.201	0.423501
3768	2072.4	196.215	1.193	0.47921
3769	2072.95	196.331	1.19	0.423333
3774	2075.7	196.84	1.19	0.42054
3783	2080.65	197.652	1.184	0.483516
3786	2082.3	197.962	1.192	0.440954
3789	2083.95	198.288	1.192	0.451005
3796	2087.8	199.082	1.166	0.450728
3796	2087.8	199.082	1.166	0.465628
3803	2091.65	199.749	1.154	0.399828
3806	2093.3	199.979	1.149	0.468121
3813	2101	200.945	1.147	0.514728
3820	2102.1	201.147	1.152	0.50022
3825	2103.75	201.433	1.141	0.451231
3829	2105.95	201.788	1.144	0.453584
3831	2107.05	201.959	1.141	0.48069
3833	2108.15	202.13	1.133	0.48964
3836	2109.8	202.409	1.13	0.52566
3839	2111.45	202.74	1.13	0.466047
3847	2115.85	203.665	1.122	0.451338
3850	2117.5	203.989	1.116	0.434149
3853	2119.15	204.306	1.112	0.428981
3856	2120.8	204.637	1.12	0.448699
3859	2122.45	204.996	1.109	0.427823
3862	2124.1	205.379	1.108	0.430081
3865	2125.75	205.754	1.111	0.406655
3868	2127.4	206.088	1.102	0.415119
3871	2129.05	206.405	1.11	0.413644
3877	2132.35	206.973	1.1	0.414413
3881	2134.55	207.334	1.103	0.437766
3884	2136.2	207.614	1.107	0.411367
3887	2137.85	207.886	1.095	0.437071
3891	2140.05	208.246	1.102	0.427127
3897	2143.35	208.817	1.13	0.449332
3902	2146.1	209.279	1.134	0.413153
3905	2147.75	209.547	1.142	0.452386
3909	2149.95	209.913	1.157	0.434326
3912	2151.6	210.186	1.158	0.443373
3919	2155.45	210.797	1.17	0.429061
3922	2157.1	211.031	1.169	0.439196
3925	2158.75	211.248	1.173	0.428644
3929	2160.95	211.529	1.169	0.485619
3939	2166.45	212.438	1.221	0.444463
3942	2168.1	212.725	1.225	0.458895
3946	2170.3	213.088	1.238	0.453971
3949	2171.95	213.347	1.248	0.453828
3952	2173.6	213.595	1.264	0.463889
3960	2178	214.292	1.27	0.480166
3963	2179.65	214.567	1.27	0.476048
3967	2181.85	214.984	1.282	0.465242
3968	2182.4	215.101	1.28	0.458001
3970	2183.5	215.319	1.266	0.475047
3974	2185.7	215.759	1.268	0.464394
3979	2188.45	216.244	1.251	0.403236
3987	2192.85	216.857	1.233	0.506731
3990	2194.5	217.125	1.225	0.471374
3995	2197.25	217.65	1.213	0.41263
3998	2198.9	217.988	1.2	0.480408
4000	2200	218.211	1.193	0.486198
4003	2201.65	218.565	1.179	0.415228
4007	2203.85	219.013	1.158	0.433638
4008	2204.4	219.123	1.157	0.450586
4009	2204.95	219.242	1.153	0.456592
4011	2206.05	219.484	1.141	0.439447
4013	2207.15	219.747	1.142	0.447431
4015	2208.25	220.014	1.125	0.460474
4019	2210.45	220.542	1.098	0.425825
4021	2211.55	220.788	1.093	0.385516
4023	2212.65	221.015	1.075	0.450091
4025	2213.75	221.235	1.065	0.425653
4027	2214.85	221.459	1.054	0.456609
4029	2215.95	221.683	1.041	0.458486
4031	2217.05	221.92	1.026	0.464924
4036	2219.8	222.644	0.991	0.473344
4038	2220.9	222.996	0.978	0.471046
4040	2222	223.403	0.966	0.460164
4043	2223.65	223.976	0.939	0.38926
4045	2224.75	224.353	0.922	0.444421
4047	2225.85	224.717	0.905	0.4362
4049	2226.95	225.057	0.884	0.436708
4051	2228.05	225.367	0.856	0.405912
4055	2230.25	225.967	0.797	0.447862
4059	2232.45	226.635	0.767	0.438797
4060	2233	226.797	0.776	0.443928
4062	2234.1	227.09	0.791	0.418989
4065	2235.75	227.482	0.802	0.48341
4067	2236.85	227.737	0.803	0.448643
4069	2237.95	228.023	0.811	0.44263
4070	2238.5	228.173	0.819	0.424857
4074	2240.7	228.787	0.837	0.423928
4076	2241.8	229.12	0.86	0.412091
4078	2242.9	229.447	0.867	0.418724
4080	2244	229.786	0.892	0.458855
4082	2245.1	230.13	0.9	0.41758
4084	2246.2	230.459	0.889	0.433922
4088	2248.4	231.029	0.84	0.410489
4090	2249.5	231.308	0.87	0.425908
4095	2252.25	232.102	0.916	0.44242
4099	2254.45	232.721	0.898	0.43632
4102	2256.1	233.124	0.877	0.416465
4104	2257.2	233.365	0.857	0.429667
4107	2258.85	233.725	0.86	0.443122
4117	2264.35	235.109	0.886	0.438814
4120	2266	235.556	0.888	0.488053
4125	2268.75	236.241	0.871	0.41564
4128	2270.4	236.602	0.879	0.441214
4131	2272.05	236.941	0.863	0.480555
4134	2273.7	237.274	0.863	0.393119
4136	2274.8	237.495	0.856	0.455063
4139	2276.45	237.828	0.861	0.437079
4145	2279.75	238.485	0.855	0.464562
4148	2281.4	238.801	0.84	0.435816
4151	2283.05	239.12	0.836	0.486361
4155	2285.25	239.542	0.822	0.457853
4158	2286.9	239.857	0.826	0.454579
4167	2291.85	240.74	0.804	0.493315
4174	2295.7	241.419	0.776	0.46518
4178	2297.9	241.785	0.755	0.457894
4182	2300.1	242.102	0.741	0.513591
4186	2302.3	242.397	0.74	0.476627
4193	2306.15	242.841	0.738	0.530746
4198	2308.9	243.198	0.741	0.497356
4201	2310.55	243.435	0.743	0.514963
4203	2311.65	243.601	0.741	0.490474
4206	2313.3	243.866	0.748	0.468788
4210	2315.5	244.231	0.742	0.467974
4212	2316.6	244.417	0.748	0.462238
4213	2317.15	244.515	0.749	0.481823
4215	2318.25	244.714	0.753	0.458461
4217	2319.35	244.932	0.767	0.446666
4219	2320.45	245.161	0.766	0.470501
4221	2321.55	245.39	0.773	0.447
4224	2323.2	245.755	0.779	0.471
4226	2324.3	246.016	0.78	0.442809
4228	2325.4	246.297	0.781	0.463375
4230	2326.5	246.599	0.786	0.448825
4231	2327.05	246.751	0.792	0.443526
4233	2328.15	247.087	0.815	0.480379
4236	2329.8	247.65	0.834	0.409162
4237	2330.35	247.831	0.821	0.422129
4239	2331.45	248.172	0.78	0.427685
4240	2332	248.331	0.768	0.402107
4242	2333.1	248.646	0.76	0.410242
4243	2333.65	248.796	0.766	0.441307
4245	2334.75	249.098	0.794	0.435402
4246	2335.3	249.257	0.798	0.421807
4248	2336.4	249.585	0.824	0.405547
4250	2337.5	249.935	0.832	0.431918
4252	2338.6	250.317	0.857	0.40949
4253	2339.15	250.522	0.869	0.424567
4255	2340.25	250.943	0.88	0.412748
4258	2341.9	251.588	0.898	0.378188
4260	2343	251.998	0.898	0.361673
4261	2343.55	252.201	0.916	0.415495
4262	2344.1	252.416	0.936	0.359667
4263	2344.65	252.633	0.94	0.400109
4267	2346.85	253.455	0.936	0.39192
4269	2347.95	253.86	0.945	0.411119
4270	2348.5	254.071	0.948	0.38687
4272	2349.6	254.477	0.929	0.389669
4273	2350.15	254.675	0.926	0.411657
4647	2555.85	327.739	1.093	0.459539
4647	2555.85	327.739	1.093	0.491845
4649	2556.95	328.029	1.086	0.491845
4651	2558.05	328.325	1.078	0.489704
4653	2559.15	328.613	1.069	0.461557
4657	2561.35	329.21	1.053	0.476306
4658	2561.9	329.361	1.048	0.376275
4661	2563.55	329.774	1.034	0.47199
4662	2564.1	329.912	1.028	0.466
4664	2565.2	330.194	1.019	0.446
4669	2567.95	330.852	0.991	0.459442
4673	2570.15	331.355	0.968	0.46077
4675	2571.25	331.626	0.956	0.472859
4678	2572.9	332.042	0.941	0.456562
4681	2574.55	332.467	0.924	0.505533
4684	2576.2	332.848	0.907	0.424262
4687	2577.85	333.182	0.887	0.481679
4692	2580.6	333.67	0.857	0.506391
4695	2582.25	333.964	0.842	0.538738
4697	2583.35	334.159	0.836	0.513247
4701	2585.55	334.548	0.834	0.504924
4704	2587.2	334.858	0.833	0.501655
4706	2588.3	335.053	0.831	0.494574
4709	2589.95	335.363	0.83	0.49452
4710	2590.5	335.469	0.828	0.489463
4713	2592.15	335.818	0.83	0.514693
4715	2593.25	336.076	0.828	0.486722
4718	2594.9	336.509	0.834	0.47642
4721	2596.55	337.006	0.837	0.42883
4722	2597.1	337.182	0.844	0.485592
4723	2597.65	337.368	0.845	0.450297
4726	2599.3	337.942	0.837	0.447981
4727	2599.85	338.143	0.836	0.428856
4729	2600.95	338.554	0.859	0.448145
4730	2601.5	338.771	0.878	0.420456
4731	2602.05	338.993	0.896	0.411429
4732	2602.6	339.222	0.917	0.42
4733	2603.15	339.459	0.939	0.379862
4736	2604.8	340.205	0.983	0.435604
4737	2605.35	340.47	1.007	0.406557
4738	2605.9	340.742	1.02	0.422295
4739	2606.45	341.021	1.039	0.417361
4741	2607.55	341.615	1.102	0.399789
4742	2608.1	341.942	1.141	0.409591
4744	2609.2	342.627	1.166	0.41526
4745	2609.75	342.968	1.195	0.429695
4746	2610.3	343.328	1.214	0.409878
4748	2611.4	344.022	1.223	0.413031
4749	2611.95	344.35	1.211	0.405075
4751	2613.05	345.028	1.228	0.411324
4753	2614.15	345.738	1.274	0.408343
4983	2740.65	409.699	2.386	0.46553
4985	2741.75	410.067	2.374	0.467112
4986	2742.3	410.25	2.366	0.486123
4987	2742.85	410.438	2.358	0.457735
4989	2743.95	410.815	2.342	0.479642
4990	2744.5	410.996	2.335	0.468214
4992	2745.6	411.357	2.315	0.475376
4993	2746.15	411.542	2.306	0.494546
4995	2747.25	411.915	2.283	0.483278
4996	2747.8	412.111	2.27	0.495022
4999	2749.45	412.718	2.232	0.498055
5000	2750	412.927	2.219	0.475064
5001	2750.55	413.141	2.204	0.496918
5002	2751.1	413.358	2.19	0.477711
5004	2752.2	413.787	2.161	0.472419
5005	2752.75	414.005	2.142	0.411909
5006	2753.3	414.239	2.122	0.492188
5008	2754.4	414.715	2.087	0.47108
5010	2755.5	415.189	2.055	0.42095
5011	2756.05	415.413	2.035	0.459565
5014	2757.7	416.09	1.977	0.463159
5015	2758.25	416.316	1.952	0.44893
5016	2758.8	416.546	1.935	0.463636
5020	2761	417.426	1.856	0.500419
5023	2762.65	418.078	1.791	0.445521
5025	2763.75	418.517	1.752	0.459385
5026	2764.3	418.738	1.73	0.517809
5029	2765.95	419.412	1.666	0.535213
5030	2766.5	419.653	1.644	0.532465
5035	2769.25	420.926	1.529	0.502479
5037	2770.35	421.465	1.479	0.482007
5038	2770.9	421.737	1.452	0.470774
5039	2771.45	422.014	1.429	0.47088
5040	2772	422.286	1.407	0.457388
5042	2773.1	422.836	1.356	0.516998
5043	2773.65	423.124	1.329	0.480939
5044	2774.2	423.415	1.307	0.458618
5045	2774.75	423.713	1.279	0.470604
5046	2775.3	424.018	1.251	0.496398
5047	2775.85	424.314	1.227	0.470702
5049	2776.95	424.9	1.176	0.458758
5050	2777.5	425.199	1.162	0.462762
5051	2778.05	425.486	1.155	0.483765
5052	2778.6	425.779	1.148	0.488039
5054	2779.7	426.309	1.136	0.471942
5055	2780.25	426.558	1.124	0.465171
5056	2780.8	426.816	1.109	0.368873
5057	2781.35	427.082	1.096	0.495954
5059	2782.45	427.664	1.069	0.494023
5064	2785.2	429.457	0.997	0.422007
5065	2785.75	429.892	0.999	0.425166
5066	2786.3	430.37	1.01	0.380766
5067	2786.85	430.825	1.004	0.432583
5068	2787.4	431.353	1.015	0.443449
5069	2787.95	431.904	1.015	0.392038
5071	2789.05	433.112	1.035	0.380626
5072	2789.6	433.74	1.041	0.412329
5073	2790.15	434.363	1.036	0.388059
5074	2790.7	434.978	1.035	0.38665
5075	2791.25	435.568	1.017	0.421248
5076	2791.8	436.136	1.014	0.361755
5077	2792.35	436.789	1.066	0.378549
5079	2793.45	438.142	1.103	0.381894
5080	2794	438.801	1.109	0.388387
5081	2794.55	439.38	1.162	0.378657
5083	2795.65	440.63	1.289	0.394072
5084	2796.2	441.302	1.327	0.39746
5085	2796.75	441.951	1.368	0.410794
5087	2797.85	443.262	1.469	0.413794
5219	2870.45	506.709	1.581	0.434012
5225	2873.75	508.958	1.59	0.457636
5226	2874.3	509.331	1.587	0.435931
5227	2874.85	509.709	1.592	0.482119
5228	2875.4	510.106	1.598	0.414748
5229	2875.95	510.537	1.603	0.431557
5230	2876.5	510.965	1.601	0.392171
5232	2877.6	511.799	1.594	0.44212
5233	2878.15	512.209	1.59	0.407926
5234	2878.7	512.622	1.588	0.428
5235	2879.25	513.038	1.59	0.426788
5237	2880.35	513.869	1.58	0.434049
5239	2881.45	514.675	1.569	0.419259
5240	2882	515.074	1.57	0.434913
5242	2883.1	515.869	1.557	0.460538
5243	2883.65	516.246	1.547	0.455464
5245	2884.75	517.02	1.539	0.445532
5246	2885.3	517.411	1.535	0.450381
5247	2885.85	517.787	1.524	0.430307
5248	2886.4	518.154	1.52	0.448338
5251	2888.05	519.288	1.511	0.412595
5253	2889.15	520.021	1.498	0.45745
5255	2890.25	520.751	1.482	0.459485
5257	2891.35	521.482	1.47	0.466693
5259	2892.45	522.216	1.46	0.421304
5260	2893	522.587	1.451	0.412677
5261	2893.55	522.954	1.444	0.440149
5262	2894.1	523.323	1.434	0.459573
5263	2894.65	523.694	1.427	0.418978
5265	2895.75	524.498	1.428	0.470675
5266	2896.3	524.897	1.429	0.377808
5267	2896.85	525.291	1.426	0.442782
5268	2897.4	525.703	1.432	0.453545
5269	2897.95	526.151	1.433	0.416483
5271	2899.05	527.031	1.431	0.391881
5272	2899.6	527.462	1.436	0.347579
5273	2900.15	527.892	1.433	0.421105
5274	2900.7	528.33	1.44	0.431999
5275	2901.25	528.765	1.432	0.451129
5276	2901.8	529.192	1.434	0.414939
5277	2902.35	529.634	1.434	0.374085
5279	2903.45	530.528	1.429	0.394261
5280	2904	530.961	1.422	0.4024
5281	2904.55	531.405	1.421	0.418496
5282	2905.1	531.846	1.418	0.417911
5283	2905.65	532.275	1.421	0.401652
5284	2906.2	532.697	1.418	0.396387
5285	2906.75	533.128	1.419	0.396204
5286	2907.3	533.564	1.417	0.41904
5287	2907.85	534.027	1.422	0.398843
5288	2908.4	534.502	1.417	0.37323
5289	2908.95	535.005	1.417	0.377511
5291	2910.05	536.106	1.437	0.369019
5292	2910.6	536.659	1.445	0.381765
5293	2911.15	537.237	1.45	0.362253

## Sheet: Prié and Landais
F. Prié and A. Landais (March to September 2022)
bag EDC	cut	depth [m]	gas age AICC2023 [ka BP]	gas age uncertainty AICC2023 [kyr]	δ15N [‰]
3891	B1	2042.73	189.802	1.20684	0.452646
3891	T1	2060.27	193.692	1.18116	0.430694
3901	B1	2063.02	194.085	1.169	0.456622
3906	B1	2068.52	195.288	1.209	0.465637
3910	B1	2139.56	208.163	1.10467	0.430701
3916	B1	2142.28	208.63	1.11822	0.436328
3921	T1	2145.52	209.185	1.12773	0.431637
3926	B1	2148.27	209.631	1.14295	0.448084
3926	T1	2150.47	210.001	1.15038	0.452907
3931	T1	2151.18	210.117	1.15036	0.451763
3936	B1	2153.77	210.538	1.16562	0.47157
3941	B1	2156.06	210.884	1.16631	0.443497
3946	B1	2159.27	211.314	1.17773	0.4542
3956	B1	2161.56	211.612	1.18209	0.464085
3961	B1	2164.77	212.141	1.22145	0.472055
3980	T1	2167.52	212.628	1.22249	0.459959
3981	B1	2175.77	213.943	1.26638	0.442669
3986	B1	2178.52	214.379	1.27094	0.463045
3988	T1	2188.48	216.248	1.25089	0.465915
3993	B1	2192.27	216.771	1.236	0.449426
3999	B1	2192.89	216.863	1.23271	0.504949
4005	B1	2199.42	218.092	1.19716	0.471025
4007	B1	2203.77	218.997	1.15873	0.442389
4009	B1	2204.87	219.225	1.15358	0.452444
4015	B1	2208.17	219.995	1.12602	0.443869
4017	B1	2209.16	220.239	1.11607	0.447994
4019	B1	2210.37	220.524	1.09946	0.432145
4027	B1	2214.77	221.443	1.05502	0.430731
4037	B1	2220.27	222.791	0.986727	0.442184
4043	B1	2223.57	223.947	0.940309	0.435989
4053	B1	2229.07	225.641	0.825473	0.441999
4061		2233.51	226.94	0.790836	0.447133
4065	B1	2235.74	227.48	0.801945	0.493624
4067	B1	2236.77	227.719	0.802709	0.513165
4069	B1	2237.87	228.001	0.812309	0.472963

## Sheet: Bouchet
M. Bouchet (August to September 2023)
bag EDC	depth [m]	gas age AICC2023 [ka BP]	gas age uncertainty AICC2023 [kyr]	δ15N [‰]
3400	1869.58	152.102	1.40353	0.435253853389135
3408	1873.93	152.986	1.38213	0.426077735632124
3687	2027.33	186.861	1.25856	0.430659151614832
3690	2028.98	187.207	1.26255	0.42569171878509
3693	2030.63	187.573	1.279	0.435443735632124
3694	2031.18	187.696	1.27856	0.445185735632124
3698	2033.38	188.187	1.27075	0.426987787558257
3700	2034.48	188.415	1.26062	0.448590743928577
3705	2037.23	188.968	1.25051	0.456103134281626
3707	2038.33	189.157	1.23489	0.46162098783438
3710	2039.98	189.41	1.22589	0.474963985758695
3713	2041.63	189.652	1.21062	0.471269735632124
3715	2042.78	189.809	1.20656	0.479032034840889
3717	2043.83	189.961	1.21522	0.474277117725739
3720	2045.48	190.252	1.218	0.467893439571898
3723	2047.13	190.585	1.21678	0.458570440862001
3730	2050.98	191.479	1.18933	0.434393723374273
3737	2054.83	192.534	1.22144	0.452431540158137
3750	2061.98	193.934	1.169	0.468881221145176
3758	2066.38	194.758	1.18525	0.477610660862743
3760	2067.53	195.037	1.21925	0.457095797576495
3773	2074.72	196.674	1.18678	0.430258077077987
3777	2076.83	197.026	1.19367	0.467380517317511
3785	2081.23	197.757	1.19373	0.463270056930358
3787	2082.33	197.968	1.19129	0.433765861853852
3795	2086.73	198.862	1.17105	0.498867611737185
3815	2097.78	200.448	1.14642	0.485861375820751
3817	2098.83	200.59	1.14505	0.481879040438131
3823	2102.13	201.152	1.15162	0.479828084058038
3830	2105.98	201.793	1.14389	0.438861650275175
3835	2108.73	202.222	1.132	0.463873228245058
3837	2109.83	202.415	1.12994	0.447953720884464
3840	2111.53	202.757	1.12869	0.434870649038301
3845	2114.23	203.325	1.11989	0.44735995440053
3847	2115.33	203.554	1.122	0.469809957708698
3850	2117.03	203.9	1.11515	0.461724590838193
3857	2120.83	204.644	1.11973	0.453038446842565
3860	2122.53	205.015	1.10973	0.439608027369889
3873	2129.72	206.526	1.10287	0.415553642145433
3948	2170.97	213.196	1.24956	0.445495789735274
3982	2189.59	216.412	1.24671	0.427927019741219

## Sheet: Klüssendorf
Klüssendorf (2023-2024)
bag EDC	depth [m]	gas age AICC2023 [ka BP]	gas age uncertainty AICC2023 [kyr]	δ15N [‰]	δ15N std [‰]
5482	3015.06	599.514	1.304	0.415024545704752	0.0201214
5483	3015.62	600.426	1.29629	0.399978474077451	0.0201486
5484	3016.12	601.188	1.28902	0.404103163334557	0.0152594
5485	3016.72	602.069	1.28415	0.438156788747832	0.00392429
5486	3017.26	602.855	1.28306	0.42557321855423	0.00483484
5487	3017.82	603.643	1.27625	0.414051390166013	0.00104634
5488	3018.38	604.376	1.27793	0.414221685383335	0.00917194
5489	3018.91	605.108	1.28449	0.44993045685264	0.0111989
5490	3019.47	605.909	1.28693	0.452116639704651	0.00599186
5491	3020.03	606.678	1.28507	0.433999351520132	0.00624214
5492	3020.58	607.449	1.28596	0.461468316242292	0.0249266
5493	3021.12	608.202	1.28696	0.454096697087963	0.0147676
5494	3021.66	608.912	1.28329	0.459864451255265	0.00467305
5495	3022.22	609.663	1.283	0.462676385694264	0.0212751
5496	3022.78	610.397	1.27625	0.459009380436904	0.0179251
5497	3023.31	611.049	1.27415	0.451374066458275	0.0174647
5498	3023.88	611.739	1.27978	0.450233630520932	0.0120094
5499	3024.43	612.4	1.28289	0.458485546650852	0.0231542
5500	3024.97	613.048	1.28589	0.479654797279061	0.00874204
5501	3025.53	613.68	1.28793	0.482807829524113	0.00094842
5505	3027.76	616.249	1.28902	0.483067229923347	0.0200571
5507	3028.83	617.472	1.29096	0.486044999446233	0.00422666
5508	3029.38	618.104	1.291	0.445286546752484	0.00463295
5509	3029.93	618.742	1.29389	0.427871726172613	0.00366163
5510	3030.45	619.363	1.29122	0.424008718477292	0.00295262
5511	3031.03	620.022	1.29293	0.465962915124663	0.00374882
5512	3031.56	620.648	1.29949	0.484235387260341	0.00313171
5513	3032.1	621.302	1.30727	0.454455162532132	0.0143568
5516	3033.76	623.395	1.33727	0.463275006866509	0.00296346
5517	3034.3	624.086	1.34356	0.429780803736729	0.0113144
5518	3034.88	624.788	1.35171	0.448419875343366	0.00223894
5519	3035.43	625.474	1.35875	0.446854788488505	0.0101059
5520	3035.98	626.17	1.36574	0.448534283881685	0.00241021
5521	3036.53	626.883	1.37564	0.457504145970606	0.0138214
5522	3037.06	627.589	1.38342	0.451726176356166	0.0254147
5523	3037.62	628.346	1.38882	0.452385292022104	0.0119322
5525	3038.7	629.739	1.40171	0.445856892101381	0.00738341
5526	3039.28	630.489	1.41742	0.405411489323881	0.00566329
5528	3040.37	632.157	1.45664	0.384885293730279	0.011322
5529	3040.91	633.145	1.49602	0.387048463875867	0.00556321
5530	3041.47	634.326	1.54044	0.380107303453953	0.00983801
5531	3042.01	635.472	1.57445	0.395237680520899	0.00207609
5533	3042.94	637.474	1.61036	0.381798137176659	0.0067221
5535	3044.2	640.151	1.70446	0.373817198705825	0.00408358
5538	3045.88	643.543	1.84115	0.372394315725215	0.00446084
5539	3046.41	644.615	1.88658	0.381136361908646	0.0133796
5540	3046.97	645.683	1.92309	0.39787042564412	0.0155699
5541	3047.51	646.629	1.95282	0.391588494893324	0.0131107
5542	3048.08	647.605	1.99547	0.373216908862415	0.00187799
5543	3048.61	648.514	2.03224	0.371435701102079	0.00871477
5544	3049.18	649.489	2.07644	0.380628853809338	0.00826713
5545	3049.7	650.373	2.10489	0.384418752926089	0.00776534
5546	3050.19	651.165	2.13318	0.382639827876955	0.0199232
5547	3050.74	652.052	2.175	0.397344498335326	0.00192912
5548	3051.37	653.096	2.20858	0.385992578408468	0.0100146
5549	3051.91	654	2.24338	0.309663757901747	0.0272952
5551	3052.9	655.678	2.28616	0.332903402389826	0.00283252
5552	3053.58	656.736	2.30256	0.379569550332427	0.00554368
5553	3054.11	657.543	2.31718	0.398138128181407	0.00813345
5554	3054.66	658.345	2.33747	0.381676791229578	0.0213457
5555	3055.22	659.223	2.35924	0.364109948497272	0.0239304
5556	3055.78	660.112	2.37831	0.371344042636876	0.013352
5557	3056.15	660.719	2.38727	0.344235268512558	0.0230914
5558	3056.87	661.915	2.41091	0.35754827085587	0.0119106
5559	3057.43	662.86	2.42645	0.354209193315251	0.0140306
5561	3058.53	664.565	2.44464	0.353669280657851	0.0054741
5563	3059.61	666.272	2.47498	0.345027975326253	0.0164682
5564	3060.18	667.219	2.49045	0.352621431203127	0.00578628
5565	3060.72	668.133	2.50256	0.385140454272285	0.000745075
5567	3061.83	669.921	2.51396	0.39255613616215	0.0200885
5568	3062.37	670.74	2.514	0.358606834868111	0.0171739
5569	3062.93	671.524	2.51111	0.379992301371832	0.00619115
5570	3063.45	672.19	2.51191	0.3999698603228	0.000658546
5571	3064.03	672.944	2.512	0.377261179158075	0.0128875
5572	3064.58	673.651	2.51296	0.385902825020906	0.00828166
5573	3065.12	674.391	2.51878	0.410244862324515	0.0203816
5574	3065.56	674.98	2.51527	0.367095883344873	0.0167553
5575	3066.22	675.901	2.52074	0.400688153522331	0.00304028
5576	3066.76	676.619	2.52285	0.369436906252907	0.0014935
5577	3067.32	677.359	2.52678	0.390356198019696	0.0160228
5578	3067.87	678.07	2.52511	0.443020513530903	0.0155817
5579	3068.32	678.63	2.52195	0.405410064885622	0.0170968
5580	3068.97	679.419	2.52293	0.427459759591094	0.00215958
5581	3069.53	680.048	2.51722	0.416623788936869	0.0138939
5582	3070.08	680.635	2.51411	0.392134812045033	0.00662372
5583	3070.62	681.226	2.514	0.406789834707396	0.00674379
5584	3071.05	681.698	2.51691	0.388166649401497	0.00354421
5585	3071.72	682.494	2.51896	0.391696919486096	0.0105342
5586	3072.24	683.081	2.51264	0.383415743853197	0.000825177
5587	3072.82	683.691	2.50526	0.415423910430722	0.0238147
5589	3073.93	684.734	2.49707	0.431128605146393	0.0107784
5590	3074.45	685.27	2.497	0.356869552561769	0.00583017
5591	3075.03	685.865	2.49893	0.402092552981715	0.00399316
5592	3075.58	686.461	2.49707	0.368170345575059	0.00161708
5593	3076.12	687.068	2.49893	0.387427632522867	0.00807987
5594	3076.67	687.648	2.49522	0.39438658396859	0.0179246
5595	3077.1	688.09	2.48918	0.405513071727717	0.00860762
5596	3077.78	688.749	2.47929	0.402581074628528	0.00459803
5597	3078.33	689.244	2.47804	0.414310927583109	0.014484
5599	3079.43	690.206	2.48	0.413568046775642	0.00726766
5600	3079.97	690.683	2.47807	0.397950920808061	0.0116435
5601	3080.53	691.146	2.47607	0.42125696910693	0.010121
5603	3081.62	692.03	2.47304	0.411391859569455	0.0212079
5604	3082.18	692.456	2.47204	0.393200166183361	0.00872061
5605	3082.72	692.875	2.47104	0.419152209961656	0.0270834
5609	3084.9	694.466	2.464	0.434114924361036	0.00362692
5610	3085.47	694.874	2.46207	0.435828379710918	0.00516538
5611	3086.03	695.251	2.45911	0.436686912679664	0.00995846
5612	3086.58	695.625	2.45707	0.431297222812692	0.0146252
5613	3087.1	695.975	2.45609	0.437353733365983	0.0022784
5614	3087.68	696.366	2.45696	0.430760097861008	0.00941067
5615	3088.22	696.736	2.45315	0.43667848871975	0.011681
5616	3088.78	697.093	2.45011	0.432172757337687	0.010889
5617	3089.32	697.436	2.44905	0.432984536294186	0.0211846
5618	3089.87	697.78	2.44616	0.437026807320879	0.000135545
5619	3090.43	698.134	2.44407	0.44395527053245	0.00122214
5620	3090.97	698.463	2.44207	0.439417928650032	0.00671876
5621	3091.53	698.784	2.43815	0.43142561804166	0.0104423
5622	3092.08	699.109	2.43704	0.443377265655351	0.00395259
5623	3092.62	699.435	2.43315	0.440273808641579	0.00260148
5624	3093.16	699.735	2.42929	0.445679606897945	0.00625285
5625	3093.71	700.048	2.42714	0.417010229778463	0.0201432
5626	3094.27	700.362	2.42511	0.438385486865367	0.00594445
5627	3094.81	700.649	2.42314	0.433218733947982	0.0233304
5629	3095.93	701.253	2.422	0.428750623605299	0.00725688
5631	3097.03	701.85	2.418	0.450336731228999	0.00673558
5633	3098.1	702.435	2.41309	0.447692162636047	0.0093861
5635	3099.22	703.05	2.40904	0.430851621301179	0.00791211
5637	3100.33	703.644	2.40211	0.455222837195485	0.00264799
5638	3100.88	703.941	2.40007	0.430462073168021	0.00523994
5639	3101.41	704.232	2.39814	0.438801949395884	0.00875397
5640	3101.97	704.545	2.39511	0.452919096204925	0.00503219
5641	3102.53	704.845	2.39114	0.452343039352162	0.0223399
5642	3102.99	705.104	2.38936	0.455186237171129	0.00276633
5644	3104.18	705.757	2.38307	0.432464827910942	0.00139061
5645	3104.57	705.982	2.38093	0.437151609339967	0.0150336
5646	3105.28	706.384	2.37711	0.436987302346795	0.00428754
5647	3105.56	706.548	2.37606	0.440865208809424	0.0118165
5648	3106.37	707.025	2.37027	0.468051626812074	0.0040579
5649	3106.93	707.357	2.36711	0.444138091911383	0.019147
5650	3107.47	707.678	2.36218	0.459238984590185	0.00288181
5652	3108.58	708.308	2.35222	0.438711988459054	0.00494124
5653	3109.12	708.619	2.34718	0.454185948137361	0.00424337
5654	3109.68	708.941	2.34507	0.459676094416703	0.00733682
5655	3110.22	709.272	2.33922	0.449627538038721	0.0184224
5656	3110.76	709.592	2.33344	0.454971288575649	0.0038381
5657	3111.33	709.937	2.32915	0.457180206102441	0.0130945
5658	3111.87	710.272	2.32238	0.431193112297976	0.00600026
5660	3112.97	710.991	2.31311	0.432102372101986	0.00158786
5661	3113.5	711.348	2.31118	0.448681457000376	0.0137666
5662	3114.08	711.748	2.30714	0.423241328787187	0.000500794
5663	3114.62	712.133	2.30227	0.425351805807275	0.00644153
5664	3115.18	712.535	2.29718	0.433929388570659	0.015225
5665	3115.72	712.931	2.29218	0.437578348741489	0.00499406
5667	3116.86	713.746	2.28395	0.423813063228548	0.00826255
5668	3117.38	714.14	2.28111	0.395743390927385	0.0236815
5669	3117.69	714.375	2.27836	0.431809285349282	0.0182265
5671	3119.04	715.414	2.26511	0.435987005664929	0.0109408
5673	3120.05	716.22	2.25982	0.45265294580764	0.00533758
5674	3120.68	716.725	2.25518	0.385392934309361	0.00964189
5675	3121.22	717.157	2.25307	0.403511224205625	0.0144306
5676	3121.76	717.581	2.25207	0.371439718751704	0.00340586
5677	3122.18	717.942	2.25338	0.395895812717637	0.00562026
5678	3122.86	718.532	2.25493	0.395357416008358	0.0081387
5679	3123.45	719.057	2.258	0.386051626104419	0.00571748
5682	3125.08	720.632	2.27649	0.419566257179067	0.0117245
5683	3125.61	721.194	2.29369	0.438776443989546	0.0228744
5684	3126.15	721.797	2.29046	0.400023751968144	0.00663375
5685	3126.73	722.347	2.28422	0.403325293627359	0.000887157
5686	3127.28	722.875	2.29942	0.397089619832111	0.0256458
5687	3127.83	723.439	2.30385	0.401395556660024	0.0052499
5688	3128.38	723.958	2.30015	0.373824403071445	0.0251692
5689	3128.93	724.466	2.31156	0.428600595716785	0.00439985
5690	3129.44	724.979	2.32109	0.407223959072797	0.0131947
5691	3129.76	725.285	2.32531	0.394764222201782	0.00852864
5692	3130.55	726.069	2.33082	0.410577742708744	0.020149
5693	3131.12	726.637	2.33486	0.392415211257197	0.00655782
5694	3131.67	727.139	2.34067	0.363931908349984	0.00214944
5695	3131.98	727.425	2.34558	0.388739288696533	0.0172289
5696	3132.78	728.197	2.36571	0.417596947935361	0.00300753
5697	3133.22	728.631	2.37134	0.397223909781298	0.00985516
5699	3134.43	729.753	2.367	0.405964227077438	0.0050973
5701	3135.53	730.699	2.37196	0.40869101674603	0.0126863
5702	3136.08	731.186	2.37778	0.363315967533127	0.00527608
5703	3136.62	731.68	2.378	0.410961538670287	0.00651645
5704	3137.18	732.167	2.37896	0.392928032345423	0.00997701
5705	3137.72	732.684	2.38189	0.395241214567018	0.00651105
5706	3138.28	733.172	2.37814	0.377817776840879	0.0130789
5707	3138.67	733.533	2.38002	0.39138507631727	0.0103938
5708	3139.38	734.226	2.381	0.417273419175248	0.0084579
5709	3139.88	734.708	2.37926	0.395325967264595	0.0130198
5710	3140.47	735.308	2.37711	0.400643940756492	0.00409715
5711	3141.03	735.912	2.38278	0.377876804627444	0.0188981
5712	3141.58	736.576	2.38493	0.353155718311594	0.00291208
5713	3142.12	737.283	2.38693	0.354333855454456	0.0120555
5715	3143.22	738.779	2.38511	0.36100728202691	0.00487845
5716	3143.77	739.514	2.39256	0.368955689319499	0.00324932
5717	3144.33	740.287	2.39782	0.377847815704352	0.0175876
5719	3145.43	741.864	2.40786	0.363531653046879	0.0104712
5720	3145.97	742.653	2.40704	0.370093816282917	0.0029575
5721	3146.53	743.428	2.40411	0.363610240487345	0.00907854
5723	3147.53	744.855	2.4076	0.383714796672446	0.0211054
5724	3148.18	745.762	2.408	0.37068224938795	0.00711406
5725	3148.57	746.331	2.408	0.364524911177241	0.00778106
5726	3149.28	747.343	2.40607	0.392750980119662	0.00136027
5727	3149.83	748.146	2.40407	0.380375607039892	0.000887672
5728	3150.36	748.92	2.404	0.37495757488532	0.00659645
5729	3150.9	749.724	2.40214	0.384725038752542	0.00443937
5730	3151.48	750.569	2.40104	0.39963644781766	0.00368365
5731	3152.03	751.403	2.39715	0.402302084646792	0.0261954
5732	3152.55	752.195	2.40064	0.394961423563592	0.00028953
5733	3153.11	753.04	2.40564	0.388564942604176	0.00209386
5734	3153.68	753.902	2.40504	0.410950373562247	0.0101756
5736	3154.77	755.538	2.40789	0.402451895370239	0.00882031
5737	3155.33	756.361	2.40511	0.418861224686448	0.00118631
5738	3155.88	757.155	2.40596	0.387201578112465	0.0165223
5739	3156.43	757.933	2.39926	0.385144075194403	0.0101475
5742	3157.93	759.796	2.37886	0.416385579085268	0.00821154
5743	3158.62	760.642	2.37315	0.430591189092481	0.0181012
5744	3159.18	761.342	2.37107	0.404212165461027	0.0228207
5745	3159.7	762.024	2.37282	0.424559818282902	0.0128854
5747	3160.83	763.631	2.37896	0.418965742922682	0.0157156
5748	3161.33	764.405	2.38249	0.429887466379963	0.0149272
5749	3161.93	765.333	2.38011	0.409761193671843	0.0117408
5750	3162.3	765.888	2.37745	0.374069331728365	0.00320042
5752	3163.55	767.634	2.36927	0.410641572447505	0.0145813
5753	3164.11	768.39	2.36522	0.430370581928858	0.0140764
5754	3164.67	769.113	2.36406	0.399702945772747	0.00019586
5755	3165.22	769.882	2.364	0.441621055126579	0.0131823
5756	3165.78	770.676	2.36689	0.402245984339645	0.00559723
5757	3166.32	771.531	2.36893	0.413033872128395	0.0134863
5758	3166.86	772.375	2.36993	0.423934053084278	0.0210937
5759	3167.41	773.239	2.37473	0.439518188644016	0.0139985
5760	3167.97	774.058	2.375	0.391116449835592	0.0170991
5761	3168.53	774.815	2.375	0.436587146557111	0.02361
5762	3169.06	775.507	2.37685	0.443457984589217	0.0056672
5764	3170.18	776.992	2.39267	0.434168019038124	0.00898509
5766	3171.28	778.553	2.41171	0.385662619110316	0.0280515
5767	3171.83	779.322	2.41874	0.437393043162552	0.026762
5768	3172.36	780.052	2.42562	0.423864725530073	0.00639419
5769	3172.93	780.784	2.43178	0.459880833019889	0.00163846
5770	3173.47	781.475	2.44067	0.446261555646226	8.2354e-05
5771	3173.86	781.946	2.44886	0.447497739246219	0.0162908
5772	3174.55	782.803	2.46482	0.45058392770957	0.0102724
5773	3175.13	783.52	2.47949	0.452256651838981	0.0121567
5774	3175.61	784.111	2.49709	0.446278615139337	0.0148501
5775	3176.23	784.84	2.51927	0.454965151649115	0.0112694
5777	3177.28	786.099	2.56731	0.435972651683046	0.021406
5779	3178.43	787.491	2.61913	0.464214533732943	0.00909075
5780	3178.97	788.139	2.64987	0.460742360713194	0.0120996
5781	3179.53	788.791	2.67895	0.470827432730075	0.0043469
5783	3180.62	790.066	2.73605	0.475086396477291	0.00682129
5784	3181.19	790.675	2.77235	0.466020210362078	0.0168317
5785	3181.71	791.235	2.80916	0.476732427972212	0.00496896
5786	3182.28	791.843	2.84573	0.488770379674565	0.00295473
5787	3182.82	792.41	2.88955	0.454522792015269	0.0141655
5788	3183.36	793.006	2.94949	0.456936066035481	0.0282346
5790	3184.47	794.353	3.08556	0.444291780516273	0.0137909
5791	3185.02	795.037	3.16174	0.436231268972447	0.00451342
5792	3185.55	795.739	3.24782	0.429167447563046	0.00331446
5793	3186.12	796.548	3.35526	0.425827261226135	0.0227634
5794	3186.65	797.319	3.47082	0.408492370645395	0.0267946
5795	3187.06	797.961	3.56774	0.427785607425164	0.00940769
5796	3187.78	799.145	3.74456	0.399408611409161	0.0081665
5797	3188.18	799.809	3.86031	0.393031941577425	0.00216522

## Sheet: Brückner
L. Brückner (January 2025 - February 2025)
bag EDC	depth [m]	gas age AICC2023 [ka BP]	gas age uncertainty AICC2023 [kyr]	δ15N [‰]
5102	2805.825	452.359	1.8945	0.362154204617741
5106	2808.025	454.929	1.953	0.364475860490793
5110	2810.225	457.436	1.9795	0.359775989318772
5114	2812.425	459.9	1.988	0.358349883095164
5118	2814.625	462.709	1.971	0.362227486416046
5122	2816.825	465.366	1.9195	0.375581303771693
5126	2819.025	467.783	1.8605	0.379250161383376
5130	2821.225	470.359	1.806	0.369883329680147
5134	2823.425	472.797	1.7375	0.405324478442911
5138	2825.625	474.867	1.6715	0.406181165141388
5142	2827.825	476.719	1.6095	0.414430217471913
5146	2830.025	478.854	1.5465	0.37080751645041
5150	2832.225	480.632	1.491	0.410130111844236
5154	2834.425	482.498	1.456	0.418081260343527
5158	2836.625	484.22	1.4345	0.410612458555882
5162	2838.825	485.79	1.4255	0.408505996161525
5166	2841.025	487.281	1.427	0.428832049123931
5170	2843.225	488.767	1.4255	0.421424401059931
5175	2845.975	490.578	1.411	0.4198122358394
5179	2848.175	491.968	1.3995	0.43728866491566
5184	2850.925	493.733	1.3965	0.425191340803485
5188	2853.125	495.192	1.4	0.416410443833197
5192	2855.325	496.647	1.417	0.404763655335466
5196	2857.525	498.138	1.4375	0.415427093904098
5204	2861.925	501.119	1.489	0.433453835834597
5210	2865.225	503.364	1.532	0.418726347124581
5214	2867.425	504.805	1.551	0.447042788485471
5218	2869.625	506.188	1.566	0.417063672721077
5222	2871.825	507.656	1.594	0.405986281824837
5226	2874.025	509.145	1.5885	0.399023233041008
5230	2876.225	510.751	1.602	0.414184005047926
5234	2878.425	512.415	1.589	0.42649349345302
5238	2880.625	514.071	1.5775	0.407207463918272
5242	2882.825	515.672	1.559	0.422183804278844
5246	2885.025	517.216	1.537	0.418883434386148
5250	2887.225	518.716	1.516	0.430312959826383
5255	2889.975	520.571	1.485	0.440989333522685
5260	2892.725	522.401	1.4555	0.453484908489906
5264	2894.925	523.896	1.429	0.428517892271201
5268	2897.125	525.497	1.429	0.420787699846967
5272	2899.325	527.247	1.4335	0.417956624262022
5276	2901.525	528.979	1.433	0.412249028813231
5280	2903.725	530.744	1.4255	0.407895237045909
5284	2905.925	532.486	1.4195	0.397452744902177
5290	2909.225	535.274	1.422	0.393300530382137

## Sheet: Bern University
P. Tinner, H. Traeger, J. Schmitt and M. Grimmer (2024 - 2025)
bag EDC	depth [m]	gas age AICC2023 [ka BP]	gas age uncertainty AICC2023 [kyr]	δ15N [‰]	δ15N std [‰]	drilling fluid affected
EDC 4280	2353.72	256.039	0.9175	0.400284	0.00489214	FALSE
EDC 4286	2357.03	257.284	0.8785	0.612695	0.00489214	TRUE
EDC 4292	2360.32	258.35	0.843	0.437234	0.0036909	TRUE
EDC 4296	2362.53	259.007	0.7855	0.409033	0.0036909	FALSE
EDC 4300	2364.72	259.768	0.775	1.24383	0.00489214	TRUE
EDC 4306	2368.03	261.029	0.827	0.418022	0.00489214	FALSE
EDC 4312	2371.33	262.374	0.8065	1.35502	0.00489214	TRUE
EDC 4316	2373.53	263.222	0.84	0.431445	0.00351136	TRUE
EDC 4320	2375.72	264.068	0.802	0.499469	0.0036909	TRUE
EDC 4324	2377.93	264.881	0.8065	0.412286	0.0036909	FALSE
EDC 4332	2382.32	266.49	0.9315	0.418129	0.0036909	FALSE
EDC 4336	2384.53	267.311	0.981	0.408578	0.00489214	FALSE
EDC 4340	2386.72	268.185	1.0565	0.417559	0.00489214	FALSE
EDC 4346	2390.03	269.515	1.115	0.416689	0.00489214	TRUE
EDC_4352	2393.33	270.921	1.161	0.402558	0.0088332	FALSE
EDC_4354	2394.43	271.416	1.186	0.4001	0.0088332	FALSE
EDC 4356	2395.53	271.916	1.1905	0.416792	0.00489214	FALSE
EDC 4360	2397.72	272.889	1.2205	0.421049	0.0036909	FALSE
EDC 4364	2399.93	273.861	1.24	0.426068	0.00489214	FALSE
EDC 4366	2401.03	274.327	1.242	0.421053	0.00489214	FALSE
EDC 4370	2403.22	275.22	1.2485	0.415427	0.00489214	FALSE
EDC 4372	2404.32	275.65	1.252	0.418033	0.00489214	FALSE
EDC 4380	2408.72	277.424	1.231	0.417534	0.0036909	FALSE
EDC 4386	2412.03	278.727	1.2485	0.426695	0.00489214	FALSE
EDC 4392	2415.32	280.025	1.2365	1.48837	0.0036909	TRUE
EDC 4400	2419.72	281.638	1.2345	0.406101	0.00489214	FALSE
EDC 4406	2423.03	282.668	1.236	0.43526	0.0036909	FALSE
EDC 4412	2426.33	283.693	1.2515	0.448572	0.00489214	FALSE
EDC 4416	2428.53	284.368	1.2435	0.438943	0.0036909	TRUE
EDC 4432	2437.32	287.044	1.2035	0.423976	0.0036909	FALSE
EDC 4442	2442.83	288.508	1.17	0.425021	0.00489214	FALSE
EDC 4452	2448.32	290.017	1.122	0.425113	0.00489214	FALSE
EDC 4464	2454.93	291.685	1.0865	0.423031	0.00489214	FALSE
EDC 4466	2456.03	291.992	1.088	0.416687	0.00351136	FALSE
EDC 4472	2459.32	293.124	1.09	0.420955	0.0036909	FALSE
EDC 4480	2463.72	294.917	1.083	0.398415	0.00351136	FALSE
EDC 4486	2467.03	296.21	1.0425	0.404365	0.00489214	FALSE
EDC 4496	2472.53	298.314	1.0635	0.385432	0.0036909	FALSE
EDC 4500	2474.72	299.27	1.023	0.393573	0.0036909	FALSE
EDC 4506	2478.03	300.559	1.0145	0.417331	0.0036909	FALSE
EDC 4512	2481.33	301.824	1.0425	0.415624	0.00489214	FALSE
EDC 4516	2483.53	302.635	1.035	3.75561	0.00489214	TRUE
EDC 4524	2487.93	304.075	1.015	0.432799	0.00489214	FALSE
EDC 4532	2492.32	305.52	0.993	5.12959	0.0036909	TRUE
EDC 4536	2494.53	306.307	1.0045	1.9905	0.00489214	TRUE
EDC 4540	2496.72	307.197	1.0165	0.404671	0.00489214	FALSE
EDC 4546	2500.03	308.555	0.9895	0.426887	0.00489214	FALSE
EDC 4556	2505.53	310.746	0.984	0.435974	0.00489214	FALSE
EDC 4560	2507.72	311.569	0.986	0.438341	0.00489214	FALSE
EDC 4566	2511.03	312.838	0.969	0.444268	0.0036909	FALSE
EDC 4574	2515.43	314.482	0.952	0.457478	0.00351136	TRUE
EDC 4580	2518.72	315.649	0.9345	0.457956	0.00489214	FALSE
EDC 4586	2522.03	316.674	0.9005	0.462919	0.0036909	FALSE
EDC 4592	2525.32	317.854	0.9755	0.527886	0.0036909	TRUE
EDC 4596	2527.53	318.735	1.028	0.451881	0.0036909	FALSE
EDC 4600	2529.72	319.721	1.0595	0.444231	0.0036909	FALSE
EDC 4606	2533.03	321.093	1.0865	0.457499	0.00489214	FALSE
EDC 4616	2538.53	322.932	1.106	0.473259	0.00489214	FALSE
EDC 4625	2543.47	324.404	1.105	0.486685	0.00489214	FALSE
EDC 4642	2552.83	326.97	1.1005	0.488838	0.00489214	FALSE
